# Supplementary material for: The effect of forensic events on health status and housing stability among homeless and vulnerably housed individuals: A cohort study
Source: PLoS One. 2019 Feb 7;14(2):e0211704. doi: 10.1371/journal.pone.0211704 (PMC6366888; doi:10.1371/journal.pone.0211704)
Supplement: S1 Dataset — (XLSX) [file pone.0211704.s002.xlsx]

## Sheet: Data set
surv_numb	arch	housing_transitions	female	city1	_3_or_more_chronic	ever_mental	employ	incarcer	problematic_substance	arrested	forensic	age_dec	white	homeless_at_interview	time
111035	b	2	1	2) Vancouver	0	1	0	0	1	0	0	3.8	0	0	0
111035	y1	0	1	2) Vancouver	0	1	1	0	1	0	0	3.8	0	0	1
111035	y2	0	1	2) Vancouver	0	1	0	1	0	1	1	3.8	0	0	2
111035	y3	1	1	2) Vancouver	0	1	0	1	0	1	1	3.8	0	0	3
111035	y4	1	1	2) Vancouver	0	1	0	0	1	0	0	3.8	0	0	4
111036	b	3	0	2) Vancouver	1	0	0	0	0	0	0	5.8	1	0	0
111036	y1	2	0	2) Vancouver	1	0	1	0	0	0	0	5.8	1	0	1
111039	b	2	1	2) Vancouver	1	1	0	0	1	0	0	3.4	1	0	0
111039	y1	2	1	2) Vancouver	1	1	0	0	1	0	0	3.4	1	0	1
111039	y2	0	1	2) Vancouver	1	1	0	0	0	0	0	3.4	1	0	2
111039	y3	1	1	2) Vancouver	1	1	0	0	1	0	0	3.4	1	0	3
111039	y4	0	1	2) Vancouver	1	1	0	0	0	0	0	3.4	1	0	4
111057	b	3	0	2) Vancouver	1	0	0	1	1	1	1	3.4	1	0	0
111057	y1	0	0	2) Vancouver	1	0	0	0	0	0	0	3.4	1	0	1
111057	y2	0	0	2) Vancouver	1	0	1	0	0	0	0	3.4	1	0	2
111057	y3	1	0	2) Vancouver	1	0	1	0	1	0	0	3.4	1	0	3
111057	y4	1	0	2) Vancouver	1	0	1	0	1	0	0	3.4	1	0	4
111058	b	3	0	2) Vancouver	0	1	1	0	0	0	0	2.9	1	0	0
111058	y2	0	0	2) Vancouver	0	1	1	0	0	0	0	2.9	1	0	2
111058	y3	1	0	2) Vancouver	0	1	1	0	0	0	0	2.9	1	0	3
111058	y4	2	0	2) Vancouver	0	1	0	0	0	1	1	2.9	1	0	4
111059	b	4	1	2) Vancouver	1	1	0	0	0	0	0	2		0	0
111059	y2	0	1	2) Vancouver	1	1	1	0	0	0	0	2		0	2
111059	y3	1	1	2) Vancouver	1	1	1	0	0	0	0	2		0	3
111059	y4	2	1	2) Vancouver	1	1	1	1	0	1	1	2		0	4
111082	b	2	0	2) Vancouver	1	0	0	0	0	0	0	4.8	0	0	0
111082	y1	0	0	2) Vancouver	1	0	1	0	0	0	0	4.8	0	0	1
111082	y2	1	0	2) Vancouver	1	0	1	0	0	0	0	4.8	0	0	2
111082	y3	1	0	2) Vancouver	1	0	1	0	0	0	0	4.8	0	0	3
111082	y4	0	0	2) Vancouver	1	0	1	0	0	0	0	4.8	0	0	4
111083	b	3	1	2) Vancouver	0	0	0	0	0	0	0	3.7	0	0	0
111083	y1	0	1	2) Vancouver	0	0	1	0	1	0	0	3.7	0	0	1
111083	y2	0	1	2) Vancouver	0	0	0	0	1	0	0	3.7	0	0	2
111083	y3	1	1	2) Vancouver	0	0	0	0	0	0	0	3.7	0	0	3
111083	y4	1	1	2) Vancouver	0	0	1	0	0	0	0	3.7	0	0	4
111088	b	3	0	2) Vancouver	1	1	1	0	0	0	0	5	1	0	0
111088	y1	1	0	2) Vancouver	1	1	1	0	1	0	0	5	1	0	1
111088	y2	0	0	2) Vancouver	1	1	1	0	0	0	0	5	1	0	2
111088	y3	1	0	2) Vancouver	1	1	1	0	0	1	1	5	1	0	3
111088	y4	1	0	2) Vancouver	1	1	1	0	0	0	0	5	1	0	4
111090	b	3	1	2) Vancouver	1	0	0	1	0	1	1	5.3	1	0	0
111090	y1	0	1	2) Vancouver	1	0	1	0	0	0	0	5.3	1	0	1
111090	y2	1	1	2) Vancouver	1	0	1	0	0	0	0	5.3	1	0	2
111090	y3	1	1	2) Vancouver	1	0	1	0	0	0	0	5.3	1	0	3
111090	y4	0	1	2) Vancouver	1	0	1	0	0	0	0	5.3	1	0	4
111091	b	2	0	2) Vancouver	1	0	1	1	0	0	1	4.4	1	0	0
111091	y1	0	0	2) Vancouver	1	0	0	1	0	0	1	4.4	1	0	1
111091	y2	0	0	2) Vancouver	1	0	0	0	0	0	0	4.4	1	0	2
111091	y3	1	0	2) Vancouver	1	0	1	0	0	0	0	4.4	1	0	3
111091	y4	1	0	2) Vancouver	1	0	1	0	0	0	0	4.4	1	0	4
111094	b	3	0	2) Vancouver	0	0	1	0	0	1	1	3.5	1	0	0
111094	y1	2	0	2) Vancouver	0	0	1	0	0	0	0	3.5	1	1	1
111094	y2	1	0	2) Vancouver	0	0	1	0	0	0	0	3.5	1	0	2
111094	y3	2	0	2) Vancouver	0	0	1	0	0	1	1	3.5	1	0	3
111098	b	2	1	2) Vancouver	1	0	0	0	1	0	0	3.8	0	0	0
111098	y1	0	1	2) Vancouver	1	0	1	1	1	1	1	3.8	0	0	1
111098	y2	3	1	2) Vancouver	1	0	0	1	1	1	1	3.8	0	0	2
111098	y3	1	1	2) Vancouver	1	0	0	0	0	0	0	3.8	0	0	3
111099	b	3	0	2) Vancouver	1	0	0	0	0	0	0	4.2	1	0	0
111099	y1	0	0	2) Vancouver	1	0	0	0	0	0	0	4.2	1	0	1
111099	y2	1	0	2) Vancouver	1	0	0	0	0	0	0	4.2	1	0	2
111099	y3	1	0	2) Vancouver	1	0	0	0	0	0	0	4.2	1	0	3
111099	y4	0	0	2) Vancouver	1	0	0	0	1	0	0	4.2	1	0	4
111110	b	5	1	2) Vancouver	1	1	1	0	1	1	1	3.4	1	0	0
111110	y1	0	1	2) Vancouver	1	1	1	0	1	0	0	3.4	1	0	1
111110	y2	1	1	2) Vancouver	1	1	1	0	0	0	0	3.4	1	0	2
111110	y3	1	1	2) Vancouver	1	1	1	0	1	0	0	3.4	1	0	3
111110	y4	1	1	2) Vancouver	1	1	0	1	1	1	1	3.4	1	0	4
111113	b	3	0	2) Vancouver	1	1	0	0	0	1	1	4.3	0	0	0
111113	y1	3	0	2) Vancouver	1	1	1	0	1	0	0	4.3	0	0	1
111113	y2	1	0	2) Vancouver	1	1	1	0	0	0	0	4.3	0	0	2
111113	y3	1	0	2) Vancouver	1	1	1	0	0	0	0	4.3	0	0	3
111113	y4	2	0	2) Vancouver	1	1	0	0	1	0	0	4.3	0	0	4
111114	b	4	0	2) Vancouver	1	0	0	0	0	0	0	4.3	1	0	0
111114	y1	0	0	2) Vancouver	1	0	0	0	0	0	0	4.3	1	0	1
111114	y2	1	0	2) Vancouver	1	0	0	0	0	0	0	4.3	1	0	2
111114	y3	2	0	2) Vancouver	1	0	0	0	0	0	0	4.3	1	0	3
111114	y4	1	0	2) Vancouver	1	0	1	0	0	0	0	4.3	1	0	4
111115	b	2	0	2) Vancouver	1	0	1	1	0	1	1	4.9	0	0	0
111116	b	2	1	2) Vancouver	1	0	0	0	1	0	0	4.4	0	0	0
111116	y1	2	1	2) Vancouver	1	0	0	0	0	0	0	4.4	0	0	1
111118	b	5	1	2) Vancouver	1	1	1	0	0	0	0	2.4	1	0	0
111118	y1	0	1	2) Vancouver	1	1	1	0	0	0	0	2.4	1	0	1
111118	y2	0	1	2) Vancouver	1	1	1	0	0	0	0	2.4	1	0	2
111118	y3	1	1	2) Vancouver	1	1	1	0	0	0	0	2.4	1	0	3
111118	y4	2	1	2) Vancouver	1	1	1	0	0	0	0	2.4	1	0	4
111119	b	4	0	2) Vancouver	1	1	0	0	0	0	0	6.2	1	0	0
111119	y1	0	0	2) Vancouver	1	1	1	0	0	0	0	6.2	1	0	1
111119	y2	0	0	2) Vancouver	1	1	0	0	0	0	0	6.2	1	0	2
111119	y3	1	0	2) Vancouver	1	1	0	0	0	0	0	6.2	1	0	3
111119	y4	2	0	2) Vancouver	1	1	0	0	0	0	0	6.2	1	0	4
111121	b	3	0	2) Vancouver	0	0	0	0	0	0	0	4.2	0	0	0
111121	y1	0	0	2) Vancouver	0	0	0	0	1	0	0	4.2	0	0	1
111121	y2	0	0	2) Vancouver	0	0	0	0	1	0	0	4.2	0	0	2
111121	y3	1	0	2) Vancouver	0	0	0	0	1	0	0	4.2	0	0	3
111121	y4	0	0	2) Vancouver	0	0	0	0	1	0	0	4.2	0	0	4
111124	b	5	1	2) Vancouver	0	0	0	0	0	1	1	4.2	1	0	0
111124	y1	1	1	2) Vancouver	0	0	0	1	0	1	1	4.2	1	0	1
111124	y2	0	1	2) Vancouver	0	0	0	1	0	0	1	4.2	1	0	2
111124	y3	1	1	2) Vancouver	0	0	0	0	0	0	0	4.2	1	0	3
111124	y4	1	1	2) Vancouver	0	0	0	0	0	0	0	4.2	1	0	4
111125	b	2	1	2) Vancouver	0	1	0	0	1	0	0	3.9	0	0	0
111125	y1	0	1	2) Vancouver	0	1	0	0	0	0	0	3.9	0	0	1
111125	y2	0	1	2) Vancouver	0	1	1	0	1	0	0	3.9	0	0	2
111125	y3	1	1	2) Vancouver	0	1	1	0	0	0	0	3.9	0	0	3
111125	y4	1	1	2) Vancouver	0	1	0	0	0	0	0	3.9	0	0	4
111126	b	3	0	2) Vancouver	1	0	0	1	1	1	1	5.3	1	0	0
111126	y1	3	0	2) Vancouver	1	0	0	1	1	1	1	5.3	1	0	1
111126	y2	1	0	2) Vancouver	1	0	0	0	0	0	0	5.3	1	0	2
111126	y3	1	0	2) Vancouver	1	0	0	0	0	0	0	5.3	1	0	3
111126	y4	0	0	2) Vancouver	1	0	0	0	0	0	0	5.3	1	0	4
111127	b	3	0	2) Vancouver	0	0	1	0	0	0	0	4.2	0	0	0
111127	y1	1	0	2) Vancouver	0	0	1	1	0	0	1	4.2	0	1	1
111127	y2	2	0	2) Vancouver	0	0	0	0	0	0	0	4.2	0	1	2
111127	y3	5	0	2) Vancouver	0	0	1	0	0	0	0	4.2	0	0	3
111127	y4	0	0	2) Vancouver	0	0	0	0	0	0	0	4.2	0	0	4
111128	b	3	1	2) Vancouver	1	1	0	0	0	0	0	5.5	0	0	0
111128	y1	0	1	2) Vancouver	1	1	1	0	0	0	0	5.5	0	0	1
111128	y2	2	1	2) Vancouver	1	1	0	0	0	0	0	5.5	0	0	2
111128	y3	2	1	2) Vancouver	1	1	0	1	0	1	1	5.5	0	0	3
111128	y4	0	1	2) Vancouver	1	1	1	1	0	1	1	5.5	0	0	4
111129	b	2	0	2) Vancouver	0	1	0	0	0	0	0	4.3	1	0	0
111129	y2	0	0	2) Vancouver	0	1	0	0	0	0	0	4.3	1	0	2
111129	y3	1	0	2) Vancouver	0	1	0	0	0	0	0	4.3	1	0	3
111129	y4	0	0	2) Vancouver	0	1	0	0	0	0	0	4.3	1	0	4
111140	b	4	0	2) Vancouver	1	1	0	1	1	1	1	4	1	0	0
111142	b	2	0	2) Vancouver	1	1	0	1	1	1	1	4.6	1	0	0
111142	y1	2	0	2) Vancouver	1	1	1	1	1	1	1	4.6	1	0	1
111142	y2	2	0	2) Vancouver	1	1	0	1	1	1	1	4.6	1	0	2
111142	y3	1	0	2) Vancouver	1	1	0	0	0	0	0	4.6	1	0	3
111142	y4	1	0	2) Vancouver	1	1	0	0	1	0	0	4.6	1	0	4
111143	b	3	0	2) Vancouver	0	1	1	1	1	1	1	5.5	0	0	0
111143	y1	3	0	2) Vancouver	0	1	0	1	1	1	1	5.5	0	0	1
111143	y2	0	0	2) Vancouver	0	1	1	0	0	1	1	5.5	0	0	2
111143	y3	1	0	2) Vancouver	0	1	0	0	1	0	0	5.5	0	0	3
111143	y4	0	0	2) Vancouver	0	1	0	1	0	1	1	5.5	0	0	4
111144	b	3	0	2) Vancouver	1	1	0	0	0	0	0	5.3	1	0	0
111144	y1	2	0	2) Vancouver	1	1	0	0	0	0	0	5.3	1	0	1
111144	y2	1	0	2) Vancouver	1	1	0	0	0	0	0	5.3	1	0	2
111144	y3	1	0	2) Vancouver	1	1	0	0	0	0	0	5.3	1	0	3
111144	y4	0	0	2) Vancouver	1	1	0	0	0	0	0	5.3	1	0	4
111145	b	2	1	2) Vancouver	1	1	1	0	0	1	1	4.6	0	0	0
111145	y1	0	1	2) Vancouver	1	1	1	0	1	0	0	4.6	0	0	1
111145	y2	0	1	2) Vancouver	1	1	0	0	0	0	0	4.6	0	0	2
111145	y3	2	1	2) Vancouver	1	1	0	0	1	0	0	4.6	0	0	3
111145	y4	0	1	2) Vancouver	1	1	0	0	1	0	0	4.6	0	0	4
111146	b	2	0	2) Vancouver	1	1	0	0	0	0	0	5	0	0	0
111146	y1	0	0	2) Vancouver	1	1	0	0	0	0	0	5	0	0	1
111146	y2	0	0	2) Vancouver	1	1	0	0	0	1	1	5	0	0	2
111146	y3	2	0	2) Vancouver	1	1	0	0	0	0	0	5	0	0	3
111146	y4	0	0	2) Vancouver	1	1	0	0	0	0	0	5	0	0	4
111149	b	1	0	2) Vancouver	1	0	0	0	0	0	0	5.4	1	0	0
111149	y1	0	0	2) Vancouver	1	0	0	0	0	0	0	5.4	1	0	1
111149	y2	0	0	2) Vancouver	1	0	0	0	0	0	0	5.4	1	0	2
111149	y3	1	0	2) Vancouver	1	0	0	0	0	0	0	5.4	1	0	3
111149	y4	0	0	2) Vancouver	1	0	1	0	0	0	0	5.4	1	0	4
111150	b	2	0	2) Vancouver	1	1	1	0	0	0	0	3	0	0	0
111150	y1	0	0	2) Vancouver	1	1	1	0	0	0	0	3	0	0	1
111150	y2	2	0	2) Vancouver	1	1	0	0	0	0	0	3	0	0	2
111150	y3	1	0	2) Vancouver	1	1	1	0	0	0	0	3	0	0	3
111150	y4	1	0	2) Vancouver	1	1	1	0	0	0	0	3	0	1	4
111151	b	2	1	2) Vancouver	1	0	1	0	1	0	0	4.6	0	0	0
111151	y1	0	1	2) Vancouver	1	0	1	0	1	0	0	4.6	0	0	1
111151	y2	0	1	2) Vancouver	1	0	0	0	1	0	0	4.6	0	0	2
111151	y3	2	1	2) Vancouver	1	0	0	0	1	0	0	4.6	0	0	3
111151	y4	1	1	2) Vancouver	1	0	0		1	0	0	4.6	0	1	4
111154	b	2	1	2) Vancouver	0	1	0	0	1	0	0	4.6	0	0	0
111155	b	4	0	2) Vancouver	1	1	1	0	1	0	0	3.2	1	0	0
111155	y1	0	0	2) Vancouver	1	1	1	0	1	0	0	3.2	1	0	1
111155	y2	0	0	2) Vancouver	1	1	1	0	1	0	0	3.2	1	0	2
111155	y3	1	0	2) Vancouver	1	1	1	0	1	0	0	3.2	1	0	3
111155	y4	2	0	2) Vancouver	1	1	1	1	1	1	1	3.2	1	0	4
111156	b	5	1	2) Vancouver	0	0	1	0	0	0	0	2.2	0	0	0
111156	y1	0	1	2) Vancouver	0	0	0	0	0	0	0	2.2	0	0	1
111156	y2	0	1	2) Vancouver	0	0	0	0	0	0	0	2.2	0	0	2
111156	y3	1	1	2) Vancouver	0	0	0	0	0	0	0	2.2	0	0	3
111156	y4	2	1	2) Vancouver	0	0	0	0	0	0	0	2.2	0	0	4
111157	b	2	0	2) Vancouver	1	0	0	0	0	0	0	5.9	1	0	0
111157	y1	1	0	2) Vancouver	1	0	0	0	0	0	0	5.9	1	0	1
111157	y2	0	0	2) Vancouver	1	0	0	0	0	0	0	5.9	1	0	2
111157	y3	1	0	2) Vancouver	1	0	0	0	0	0	0	5.9	1	0	3
111157	y4	1	0	2) Vancouver	1	0	0	0	0	0	0	5.9	1	0	4
111158	b	4	0	2) Vancouver	1	1	1	1	0	1	1	2.7	1	0	0
111158	y1	1	0	2) Vancouver	1	1	0	1	0	0	1	2.7	1	0	1
111158	y2	3	0	2) Vancouver	1	1	1	1	1	1	1	2.7	1	0	2
111158	y3	3	0	2) Vancouver	1	1	1	0	0	0	0	2.7	1	0	3
111158	y4	0	0	2) Vancouver	1	1	1	0	0	0	0	2.7	1	0	4
111162	b	2	0	2) Vancouver	1	1	1	0	0	0	0	4.8	1	0	0
111162	y1	0	0	2) Vancouver	1	1	0	0	1	0	0	4.8	1	0	1
111162	y2	1	0	2) Vancouver	1	1	0	0	1	0	0	4.8	1	0	2
111162	y3	1	0	2) Vancouver	1	1	0	0	1	0	0	4.8	1	0	3
111162	y4	0	0	2) Vancouver	1	1	0	1	0	1	1	4.8	1	0	4
111180	b	2	0	2) Vancouver	0	0	0	0	0	0	0	4	0	0	0
111180	y1	0	0	2) Vancouver	0	0	0	0	0	0	0	4	0	0	1
111180	y2	0	0	2) Vancouver	0	0	0	0	0	0	0	4	0	0	2
111180	y3	1	0	2) Vancouver	0	0	0	0	0	0	0	4	0	0	3
111180	y4	1	0	2) Vancouver	0	0	0	0	0	0	0	4	0	0	4
111181	b	2	0	2) Vancouver	0	0	1	0	0	0	0	4.6	1	0	0
111181	y1	1	0	2) Vancouver	0	0	0	1	0	1	1	4.6	1	0	1
111181	y2	0	0	2) Vancouver	0	0	0	1	1	1	1	4.6	1	0	2
111181	y3	1	0	2) Vancouver	0	0	0	1	0	1	1	4.6	1	0	3
111182	b	2	0	2) Vancouver	0	0	1	0	0	0	0	5.4	1	0	0
111182	y1	1	0	2) Vancouver	0	0	0	1	0	1	1	5.4	1	1	1
111182	y2	4	0	2) Vancouver	0	0	0	0	0	0	0	5.4	1	0	2
111182	y3	3	0	2) Vancouver	0	0	0	1	0	1	1	5.4	1	1	3
111182	y4	2	0	2) Vancouver	0	0	0	0	0	0	0	5.4	1	0	4
111186	b	4	0	2) Vancouver	0	0	1	1	1	0	1	4.8	1	0	0
111186	y3	0	0	2) Vancouver	0	0	0	1	1	0	1	4.8	1	1	3
111187	b	4	1	2) Vancouver	0	0	0	0	1	0	0	3.9	1	0	0
111187	y1	0	1	2) Vancouver	0	0	0	0	0	0	0	3.9	1	0	1
111187	y2	0	1	2) Vancouver	0	0	0	0	0	0	0	3.9	1	0	2
111187	y3	1	1	2) Vancouver	0	0	0	0	0	0	0	3.9	1	0	3
111187	y4	1	1	2) Vancouver	0	0	0	0	0	0	0	3.9	1	0	4
111200	b	2	0	2) Vancouver	1	0	0	0	0	0	0	4.9	1	0	0
111200	y1	0	0	2) Vancouver	1	0	0	0	0	0	0	4.9	1	0	1
111200	y2	0	0	2) Vancouver	1	0	0	0	0	0	0	4.9	1	0	2
111200	y3	1	0	2) Vancouver	1	0	0	0	0	0	0	4.9	1	0	3
111201	b	4	1	2) Vancouver	1	1	0	1	0	1	1	5.2	0	0	0
111201	y2	3	1	2) Vancouver	1	1	0	1	0	1	1	5.2	0	0	2
111201	y3	3	1	2) Vancouver	1	1	0	1	0	1	1	5.2	0	0	3
111201	y4	2	1	2) Vancouver	1	1	0	0	0	0	0	5.2	0	1	4
111202	b	3	0	2) Vancouver	0	1	1	0	0	0	0	3.6	1	0	0
111202	y1	1	0	2) Vancouver	0	1	0	0	0	0	0	3.6	1	0	1
111202	y3	1	0	2) Vancouver	0	1	1	0	0	0	0	3.6	1	0	3
111202	y4	1	0	2) Vancouver	0	1	1	0	0	0	0	3.6	1	0	4
111203	b	4	1	2) Vancouver	1	0	1	0	1	0	0	3.3	0	0	0
111204	b	3	0	2) Vancouver	0	0	1	0	1	0	0	3.6	0	0	0
111204	y1	1	0	2) Vancouver	0	0	1	1	1	0	1	3.6	0	0	1
111204	y2	0	0	2) Vancouver	0	0	1	0	0	0	0	3.6	0	0	2
111204	y3	1	0	2) Vancouver	0	0	1	0	0	0	0	3.6	0	0	3
111204	y4	4	0	2) Vancouver	0	0	1	0	0	0	0	3.6	0	1	4
111205	b	2	1	2) Vancouver	1	1	0		1	1	1	3.7	0	0	0
111205	y1	3	1	2) Vancouver	1	1	0	0	1	0	0	3.7	0	0	1
111205	y2	4	1	2) Vancouver	1	1	0	1	0	0	1	3.7	0	0	2
111205	y3	3	1	2) Vancouver	1	1	0	0	1	0	0	3.7	0	0	3
111205	y4	0	1	2) Vancouver	1	1	0	0	0	0	0	3.7	0	0	4
111206	b	4	0	2) Vancouver	1	0	1		0	0	0	4.2	0	0	0
111206	y1	0	0	2) Vancouver	1	0	1	1	0	1	1	4.2	0	0	1
111206	y2	0	0	2) Vancouver	1	0	1	1	0	1	1	4.2	0	0	2
111206	y3	1	0	2) Vancouver	1	0	1	0	0	0	0	4.2	0	0	3
111207	b	3	0	2) Vancouver	1	1	0	0	1	0	0	3	1	0	0
111207	y2	4	0	2) Vancouver	1	1	1	0	1	0	0	3	1	0	2
111207	y3	3	0	2) Vancouver	1	1	0	1	1	1	1	3	1	1	3
111207	y4	3	0	2) Vancouver	1	1	0	0	1	1	1	3	1	0	4
111208	b	6	1	2) Vancouver	1	1	1		1	0	0	3	1	0	0
111208	y2	4	1	2) Vancouver	1	1	0	0	1	1	1	3	1	0	2
111208	y3	2	1	2) Vancouver	1	1	0	0	1	0	0	3	1	1	3
111208	y4	1	1	2) Vancouver	1	1	1	0	1	0	0	3	1	0	4
111209	b	2	1	2) Vancouver	1	1	0	0	0	0	0	4.8	0	0	0
111209	y1	1	1	2) Vancouver	1	1	0	0	0	0	0	4.8	0	0	1
111209	y2	0	1	2) Vancouver	1	1	0	0	0	0	0	4.8	0	0	2
111209	y3	1	1	2) Vancouver	1	1	0	0	0	0	0	4.8	0	0	3
111209	y4	1	1	2) Vancouver	1	1	1	0	0	0	0	4.8	0	0	4
111219	b	4	0	2) Vancouver	1	0	1	1	1	0	1	4.5	1	0	0
111219	y1	3	0	2) Vancouver	1	0	1	0	0	0	0	4.5	1	0	1
111219	y2	0	0	2) Vancouver	1	0	1	1	0	0	1	4.5	1	0	2
111219	y3	1	0	2) Vancouver	1	0	1	0	0	0	0	4.5	1	0	3
111219	y4	0	0	2) Vancouver	1	0	1	0	0	0	0	4.5	1	0	4
111223	b	3	1	2) Vancouver	0	1	0	0	0	0	0	5.6	1	0	0
111223	y1	0	1	2) Vancouver	0	1	0	0	0	0	0	5.6	1	0	1
111224	b	2	0	2) Vancouver	1	1	0	0	0	0	0	2.7	0	0	0
111224	y1	0	0	2) Vancouver	1	1	1	0	1	0	0	2.7	0	0	1
111224	y2	0	0	2) Vancouver	1	1	1	0	0	0	0	2.7	0	0	2
111224	y3	3	0	2) Vancouver	1	1	1	1	0	1	1	2.7	0	0	3
111224	y4	2	0	2) Vancouver	1	1	1	0	0	0	0	2.7	0	0	4
111227	b	4	0	2) Vancouver	1	0	0	0	1	0	0	5	0	0	0
111227	y1	0	0	2) Vancouver	1	0	0	1	1	1	1	5	0	0	1
111227	y2	0	0	2) Vancouver	1	0	0	1	1	0	1	5	0	0	2
111227	y3	1	0	2) Vancouver	1	0	0	0	1	0	0	5	0	0	3
111227	y4	1	0	2) Vancouver	1	0	0	0	1	0	0	5	0	0	4
111231	b	5	0	2) Vancouver	1	1	0	1	0	1	1	4.4		0	0
111231	y1	2	0	2) Vancouver	1	1	0	1	0	1	1	4.4		1	1
111231	y2	2	0	2) Vancouver	1	1	0	0	1	0	0	4.4		0	2
111231	y3	1	0	2) Vancouver	1	1	1	0	0	0	0	4.4		0	3
111231	y4	0	0	2) Vancouver	1	1	1	1	0	1	1	4.4		0	4
111232	b	1	1	2) Vancouver	1	0	0	0	1	0	0	3.1		0	0
111232	y2	1	1	2) Vancouver	1	0	0	0	0	0	0	3.1		1	2
111232	y3	1	1	2) Vancouver	1	0	0	1	1	1	1	3.1		1	3
111232	y4	1	1	2) Vancouver	1	0	0	0	1	0	0	3.1		0	4
111233	b	4	0	2) Vancouver	1	0	0	0	0	0	0	5	0	0	0
111233	y1	0	0	2) Vancouver	1	0	1	0	0	0	0	5	0	0	1
111233	y2	3	0	2) Vancouver	1	0	1	1	0	0	1	5	0	1	2
111233	y3	2	0	2) Vancouver	1	0	1	0	0	0	0	5	0	0	3
111233	y4	0	0	2) Vancouver	1	0	1	0	0	1	1	5	0	0	4
111234	b	2	0	2) Vancouver	1	0	0	1	0	1	1	3.7	1	0	0
111234	y1	0	0	2) Vancouver	1	0	0	1	0	1	1	3.7	1	0	1
111235	b	2	0	2) Vancouver	1	0	0		1	0	0	3.6	0	0	0
111235	y1	0	0	2) Vancouver	1	0	0	0	0	0	0	3.6	0	0	1
111235	y2	0	0	2) Vancouver	1	0	0	0	0	0	0	3.6	0	0	2
111235	y3	1	0	2) Vancouver	1	0	0	0	0	0	0	3.6	0	0	3
111235	y4	1	0	2) Vancouver	1	0	0	0	0	0	0	3.6	0	1	4
111236	b	3	0	2) Vancouver	0		1		0	0	0	5.2	1	0	0
111236	y1	0	0	2) Vancouver	0		0	0	0	0	0	5.2	1	0	1
111236	y2	0	0	2) Vancouver	0		0	0	0	0	0	5.2	1	0	2
111236	y3	1	0	2) Vancouver	0		0	0	0	0	0	5.2	1	0	3
111236	y4	0	0	2) Vancouver	0		1	0	0	0	0	5.2	1	0	4
111237	b	2	0	2) Vancouver	1	1	0	1	0	1	1	5.1	1	0	0
111237	y1	0	0	2) Vancouver	1	1	0	0	1	0	0	5.1	1	0	1
111237	y2	3	0	2) Vancouver	1	1	0	0	0	0	0	5.1	1	0	2
111237	y3	3	0	2) Vancouver	1	1	1	0	1	0	0	5.1	1	1	3
111237	y4	2	0	2) Vancouver	1	1	0	0	0	0	0	5.1	1	1	4
111238	b	2	0	2) Vancouver	1		0	1	0	1	1	4.9	1	0	0
111238	y1	0	0	2) Vancouver	1		1	0	1	0	0	4.9	1	0	1
111238	y2	0	0	2) Vancouver	1		0	0	0	0	0	4.9	1	0	2
111238	y3	1	0	2) Vancouver	1		1	0	0	0	0	4.9	1	0	3
111238	y4	1	0	2) Vancouver	1		1	0	1	0	0	4.9	1	0	4
111239	b	3	0	2) Vancouver	0	0	0	0	1	1	1	5.8	0	0	0
111239	y1	0	0	2) Vancouver	0	0	0	0	1	0	0	5.8	0	0	1
111239	y2	0	0	2) Vancouver	0	0	0	0	1	0	0	5.8	0	0	2
111239	y3	1	0	2) Vancouver	0	0	0	1	0	1	1	5.8	0	0	3
111239	y4	0	0	2) Vancouver	0	0	0	0	0	0	0	5.8	0	0	4
111240	b	3	0	2) Vancouver	1	0	0	1	1	1	1	3.8	0	0	0
111240	y1	0	0	2) Vancouver	1	0	1	0	1	1	1	3.8	0	0	1
111240	y2	0	0	2) Vancouver	1	0	1	1	1	0	1	3.8	0	0	2
111240	y3	1	0	2) Vancouver	1	0	1	0	1	0	0	3.8	0	0	3
111240	y4	1	0	2) Vancouver	1	0	1	1	1	0	1	3.8	0	1	4
111245	b	4	1	2) Vancouver	1	1	0	0	1	0	0	2.7	1	0	0
111245	y1	1	1	2) Vancouver	1	1	0	0	0	0	0	2.7	1	0	1
111245	y2	4	1	2) Vancouver	1	1	0	1	0	1	1	2.7	1	0	2
111245	y3	1	1	2) Vancouver	1	1	0	0	0	0	0	2.7	1	0	3
111245	y4	2	1	2) Vancouver	1	1	0	0	1	0	0	2.7	1	0	4
111247	b	2	1	2) Vancouver	0	0	0	1	1	1	1	2.5	0	0	0
111247	y1	2	1	2) Vancouver	0	0	0	0	0	0	0	2.5	0	0	1
111247	y2	0	1	2) Vancouver	0	0	0	0	0	0	0	2.5	0	0	2
111247	y3	2	1	2) Vancouver	0	0	0	0	0	0	0	2.5	0	0	3
111247	y4	0	1	2) Vancouver	0	0	0	0	0	0	0	2.5	0	0	4
111248	b	3	1	2) Vancouver	0	1	0	1	1	1	1	2.4	0	0	0
111248	y1	1	1	2) Vancouver	0	1	0	0	1	1	1	2.4	0	0	1
111248	y2	0	1	2) Vancouver	0	1	0	1	0	1	1	2.4	0	0	2
111248	y3	2	1	2) Vancouver	0	1	0	0	1	1	1	2.4	0	1	3
111248	y4	3	1	2) Vancouver	0	1	1	1	1	1	1	2.4	0	0	4
111249	b	2	1	2) Vancouver	1	1	0	0	1	0	0	3.6	1	0	0
111249	y1	4	1	2) Vancouver	1	1	0	0	1	0	0	3.6	1	0	1
111249	y2	2	1	2) Vancouver	1	1	1	0	1	0	0	3.6	1	0	2
111249	y3	1	1	2) Vancouver	1	1	0	0	1	0	0	3.6	1	0	3
111249	y4	1	1	2) Vancouver	1	1	1	0	1	0	0	3.6	1	0	4
111250	b	2	0	2) Vancouver	0	0	1	0	1	0	0	4.4	0	0	0
111250	y3	1	0	2) Vancouver	0	0	0	0	0	0	0	4.4	0	1	3
111250	y4	1	0	2) Vancouver	0	0	0	0	1	0	0	4.4	0	0	4
111251	b	2	0	2) Vancouver	0	0	0	0	1	0	0	5.3	0	0	0
111251	y1	0	0	2) Vancouver	0	0	1	0	0	0	0	5.3	0	0	1
111251	y2	0	0	2) Vancouver	0	0	0	0	1	0	0	5.3	0	0	2
111251	y3	1	0	2) Vancouver	0	0	0	0	0	0	0	5.3	0	0	3
111251	y4	0	0	2) Vancouver	0	0	0	0	1	0	0	5.3	0	0	4
111252	b	2	0	2) Vancouver	1	1	0	0	0	0	0	4.9	1	0	0
111252	y2	2	0	2) Vancouver	1	1	0	1	0	1	1	4.9	1	0	2
111252	y3	2	0	2) Vancouver	1	1	0	1	0	1	1	4.9	1	0	3
111252	y4	2	0	2) Vancouver	1	1	0	1	1	1	1	4.9	1	0	4
111253	b	3	0	2) Vancouver	1	0	0	1	0	1	1	3.8	1	0	0
111253	y3	2	0	2) Vancouver	1	0	1	1	0	1	1	3.8	1	0	3
111253	y4	1	0	2) Vancouver	1	0	1	0	0	0	0	3.8	1	0	4
111254	b	2	0	2) Vancouver	1	1	1	0	0	0	0	5.7	1	0	0
111254	y1	0	0	2) Vancouver	1	1	0	0	0	0	0	5.7	1	0	1
111254	y2	0	0	2) Vancouver	1	1	0	0	0	0	0	5.7	1	0	2
111254	y3	1	0	2) Vancouver	1	1	1	0	0	0	0	5.7	1	0	3
111254	y4	0	0	2) Vancouver	1	1	0	0	1	0	0	5.7	1	0	4
111255	b	2	0	2) Vancouver	1	1	1	0	1	0	0	4.4	1	0	0
111255	y1	0	0	2) Vancouver	1	1	1	0	0	0	0	4.4	1	0	1
111255	y2	0	0	2) Vancouver	1	1	1	0	0	0	0	4.4	1	0	2
111255	y3	1	0	2) Vancouver	1	1	1	0	0	0	0	4.4	1	0	3
111255	y4	1	0	2) Vancouver	1	1	1	0	0	0	0	4.4	1	0	4
111256	b	2	0	2) Vancouver	1	1	1	1	0	1	1	4.4	0	0	0
111256	y1	1	0	2) Vancouver	1	1	1	0	1	0	0	4.4	0	0	1
111256	y2	0	0	2) Vancouver	1	1	1	0	1	0	0	4.4	0	0	2
111256	y3	1	0	2) Vancouver	1	1	1	0	0	0	0	4.4	0	0	3
111256	y4	1	0	2) Vancouver	1	1	1	0	0	0	0	4.4	0	0	4
111258	b	4	0	2) Vancouver	0	0	0	1	1	1	1	4.3	1	0	0
111258	y1	2	0	2) Vancouver	0	0	1	0	0	0	0	4.3	1	0	1
111258	y2	2	0	2) Vancouver	0	0	0	0	0	0	0	4.3	1	0	2
111258	y3	1	0	2) Vancouver	0	0	1	0	0	0	0	4.3	1	0	3
111258	y4	1	0	2) Vancouver	0	0	1	0	1	0	0	4.3	1	0	4
111259	b	4	1	2) Vancouver	1	1	0	0	1	0	0	3.9	0	0	0
111260	b	3	0	2) Vancouver	0	1	0	1	0	1	1	3.8	1	0	0
111260	y2	1	0	2) Vancouver	0	1	0	0	0	0	0	3.8	1	0	2
111260	y3	4	0	2) Vancouver	0	1	0	1	0	0	1	3.8	1	1	3
111261	b	2	0	2) Vancouver	0	0	0	0		0	0	2.5	0	0	0
111261	y1	2	0	2) Vancouver	0	0	1	0	1	0	0	2.5	0	0	1
111261	y2	0	0	2) Vancouver	0	0	1	0	1	1	1	2.5	0	0	2
111261	y3	2	0	2) Vancouver	0	0	0	0		0	0	2.5	0	0	3
111261	y4	1	0	2) Vancouver	0	0	0	0	1	0	0	2.5	0	0	4
111262	b	2	1	2) Vancouver	1	1	1	1	1	1	1	4.3	0	0	0
111262	y1	0	1	2) Vancouver	1	1	1	0	1	0	0	4.3	0	0	1
111262	y2	0	1	2) Vancouver	1	1	1	0	1	0	0	4.3	0	0	2
111262	y3	2	1	2) Vancouver	1	1	1	0	1	0	0	4.3	0	1	3
111262	y4	0	1	2) Vancouver	1	1	1	0	0	0	0	4.3	0	1	4
111263	b	3	0	2) Vancouver	1	1	1	1	1	1	1	5.2	1	0	0
111263	y1	1	0	2) Vancouver	1	1	1	1	1	1	1	5.2	1	1	1
111263	y2	1	0	2) Vancouver	1	1	0	1	0	1	1	5.2	1	0	2
111263	y3	2	0	2) Vancouver	1	1	1	0	0	0	0	5.2	1	0	3
111263	y4	0	0	2) Vancouver	1	1	1	0	0	0	0	5.2	1	0	4
111280	b	4	1	2) Vancouver	0	1	0	0	1	0	0	2.8	0	0	0
111280	y1	2	1	2) Vancouver	0	1	0	1	1	1	1	2.8	0	1	1
111280	y2	3	1	2) Vancouver	0	1	0	1	1	1	1	2.8	0	0	2
111280	y3	5	1	2) Vancouver	0	1	0	0	0	0	0	2.8	0	0	3
111280	y4	1	1	2) Vancouver	0	1	0	0	0	0	0	2.8	0	1	4
111281	b	1	0	2) Vancouver	0	0	1	0	0	0	0	4	1	0	0
111283	b	2	0	2) Vancouver	0	1	0	0	0	0	0	5	1	0	0
111283	y1	0	0	2) Vancouver	0	1	0	0	0	0	0	5	1	0	1
111283	y2	1	0	2) Vancouver	0	1	0	0	0	0	0	5	1	0	2
111283	y3	1	0	2) Vancouver	0	1	0	0	0	0	0	5	1	0	3
111283	y4	0	0	2) Vancouver	0	1	1	0	0	0	0	5	1	0	4
111284	b	2	1	2) Vancouver	1	1	0	0	1	0	0	3.2	0	0	0
111284	y2	1	1	2) Vancouver	1	1	0	0	1	0	0	3.2	0	0	2
111284	y3	3	1	2) Vancouver	1	1	0	1	1	1	1	3.2	0	0	3
111284	y4	3	1	2) Vancouver	1	1	1	0	1	1	1	3.2	0	0	4
111286	b	2	1	2) Vancouver	0	0	1	0	1	0	0	2.8	0	0	0
111286	y2	1	1	2) Vancouver	0	0	0	0	0	0	0	2.8	0	0	2
111286	y3	1	1	2) Vancouver	0	0	1	0	0	0	0	2.8	0	0	3
111286	y4	0	1	2) Vancouver	0	0	0	0	0	0	0	2.8	0	0	4
111287	b	2	1	2) Vancouver	0	0	1	0	1	1	1	3.1	0	0	0
111287	y1	0	1	2) Vancouver	0	0	1	1	0	1	1	3.1	0	0	1
111287	y2	3	1	2) Vancouver	0	0	0	0	0	0	0	3.1	0	0	2
111287	y3	2	1	2) Vancouver	0	0	0	0	0	0	0	3.1	0	0	3
111287	y4	0	1	2) Vancouver	0	0	0	0	0	0	0	3.1	0	0	4
111288	b	3	1	2) Vancouver	0	0	1	0	0	0	0	3.7	1	0	0
111288	y1	0	1	2) Vancouver	0	0	0	0	0	0	0	3.7	1	0	1
111288	y2	0	1	2) Vancouver	0	0	0	0	0	0	0	3.7	1	0	2
111288	y3	2	1	2) Vancouver	0	0	0	0	0	0	0	3.7	1	1	3
111288	y4	1	1	2) Vancouver	0	0	0	0	0	0	0	3.7	1	0	4
111289	b	3	1	2) Vancouver	0	1	0	0	1	0	0	3.6	0	0	0
111289	y2	2	1	2) Vancouver	0	1	0	0	1	0	0	3.6	0	0	2
111289	y3	2	1	2) Vancouver	0	1	0	0	1	0	0	3.6	0	1	3
111289	y4	1	1	2) Vancouver	0	1	0	1	1	1	1	3.6	0	1	4
111290	b	4	0	2) Vancouver	0	0	0	0	1	0	0	3.8	1	0	0
111290	y1	0	0	2) Vancouver	0	0	0	1	1	1	1	3.8	1	0	1
111290	y2	6	0	2) Vancouver	0	0	1	1	0	1	1	3.8	1	1	2
111290	y3	4	0	2) Vancouver	0	0	1	0	0	0	0	3.8	1	0	3
111290	y4	0	0	2) Vancouver	0	0	1	0	0	0	0	3.8	1	0	4
111291	b	4	1	2) Vancouver	1	1	0	1	1	1	1	4	0	0	0
111291	y1	0	1	2) Vancouver	1	1	0	1	1	1	1	4	0	0	1
111291	y2	1	1	2) Vancouver	1	1	1	0	1	0	0	4	0	0	2
111291	y3	2	1	2) Vancouver	1	1	0	0	1	0	0	4	0	0	3
111291	y4	0	1	2) Vancouver	1	1	0	1	1	1	1	4	0	0	4
111292	b	5	1	2) Vancouver	1	1	0	0	0	0	0	5.8	1	0	0
111292	y1	0	1	2) Vancouver	1	1	1	0	0	0	0	5.8	1	0	1
111292	y2	0	1	2) Vancouver	1	1	0	0	0	0	0	5.8	1	0	2
111292	y3	2	1	2) Vancouver	1	1	1	0	0	0	0	5.8	1	0	3
111292	y4	0	1	2) Vancouver	1	1	0	0	0	0	0	5.8	1	0	4
111293	b	2	0	2) Vancouver	1	1	1	0	0	0	0	5	1	0	0
111293	y1	0	0	2) Vancouver	1	1	1	1	0	1	1	5	1	0	1
111293	y2	0	0	2) Vancouver	1	1	1	1	0	1	1	5	1	0	2
111293	y3	1	0	2) Vancouver	1	1	1	1	0	1	1	5	1	0	3
111293	y4	0	0	2) Vancouver	1	1	0	0	0	0	0	5	1	0	4
111294	b	4	1	2) Vancouver	1	1	0	0	1	1	1	5.6	0	0	0
111296	b	3	0	2) Vancouver	0	0	0	0	1	0	0	4.5	1	0	0
111296	y1	2	0	2) Vancouver	0	0	1	0	1	0	0	4.5	1	0	1
111296	y2	2	0	2) Vancouver	0	0	1	0	1	0	0	4.5	1	1	2
111296	y3	3	0	2) Vancouver	0	0	1	0	0	0	0	4.5	1	0	3
111296	y4	3	0	2) Vancouver	0	0	1	0	1	0	0	4.5	1	0	4
111297	b	2	0	2) Vancouver	0	0	0	1	1	1	1	3	0	0	0
111297	y1	3	0	2) Vancouver	0	0	1	1	0	1	1	3	0	1	1
111297	y2	1	0	2) Vancouver	0	0	0	1	0	0	1	3	0	0	2
111297	y3	3	0	2) Vancouver	0	0	1	0	0	0	0	3	0	0	3
111297	y4	3	0	2) Vancouver	0	0	1	1	1	1	1	3	0	0	4
111298	b	2	0	2) Vancouver	1	0	0	0	0	0	0	3.8	1	0	0
111298	y1	1	0	2) Vancouver	1	0	1	0	1	1	1	3.8	1	1	1
111298	y2	0	0	2) Vancouver	1	0	0	1	0	1	1	3.8	1	1	2
111298	y3	2	0	2) Vancouver	1	0	0	1	1	1	1	3.8	1	1	3
111298	y4	1	0	2) Vancouver	1	0	0	1	0	1	1	3.8	1	1	4
111299	b	2	0	2) Vancouver	0	1	1	1	1	1	1	4.3	0	0	0
111299	y1	1	0	2) Vancouver	0	1	0	1	1	1	1	4.3	0	0	1
111299	y2	0	0	2) Vancouver	0	1	0	0	1	0	0	4.3	0	0	2
111299	y3	2	0	2) Vancouver	0	1	1	0	1	1	1	4.3	0	0	3
111299	y4	0	0	2) Vancouver	0	1	0	1	1	1	1	4.3	0	0	4
111304	b	6	1	2) Vancouver	0	1	0	0	1	0	0	4.2	1	0	0
111304	y1	0	1	2) Vancouver	0	1	0	0	1	0	0	4.2	1	0	1
111304	y2	1	1	2) Vancouver	0	1	0	0	1	0	0	4.2	1	1	2
111304	y3	2	1	2) Vancouver	0	1	0	0	1	0	0	4.2	1	0	3
111304	y4	1	1	2) Vancouver	0	1	0	0	1	0	0	4.2	1	0	4
111306	b	3	0	2) Vancouver	0	1	1	1	0	0	1	4.4	0	0	0
111306	y1	1	0	2) Vancouver	0	1	0	1	0	1	1	4.4	0	0	1
111310	b	4	0	2) Vancouver	1	1	1	1	0	1	1	4.3	1	0	0
111310	y1	1	0	2) Vancouver	1	1	0	0	0	0	0	4.3	1	0	1
111310	y2	0	0	2) Vancouver	1	1	0	0	0	0	0	4.3	1	0	2
111310	y3	2	0	2) Vancouver	1	1	0	0	0	1	1	4.3	1	0	3
111311	b	3	0	2) Vancouver	0	1	1	0	1	0	0	4	1	0	0
111311	y1	1	0	2) Vancouver	0	1	1	1	0	1	1	4	1	0	1
111312	b	3	0	2) Vancouver	0	1	1	1	1	1	1	4.1	1	0	0
111312	y1	2	0	2) Vancouver	0	1	0	0	1	0	0	4.1	1	0	1
111312	y2	1	0	2) Vancouver	0	1	1	0	1	0	0	4.1	1	0	2
111312	y3	1	0	2) Vancouver	0	1	0	0	0	0	0	4.1	1	0	3
111312	y4	1	0	2) Vancouver	0	1	1	0	1	0	0	4.1	1	1	4
111313	b	2	0	2) Vancouver	1	1	0	0	0	0	0	4.8	1	0	0
111313	y1	0	0	2) Vancouver	1	1	0	0	1	1	1	4.8	1	0	1
111313	y2	0	0	2) Vancouver	1	1	0	0	1	0	0	4.8	1	0	2
111313	y3	1	0	2) Vancouver	1	1	0	0	1	0	0	4.8	1	0	3
111313	y4	0	0	2) Vancouver	1	1	0	0	1	0	0	4.8	1	0	4
111314	b	2	1	2) Vancouver	1	0	0	1	1	1	1	3.8	1	0	0
111314	y1	0	1	2) Vancouver	1	0	0	1	0	1	1	3.8	1	0	1
111314	y2	2	1	2) Vancouver	1	0	0	0	0	0	0	3.8	1	0	2
111314	y3	2	1	2) Vancouver	1	0	0	0	1	0	0	3.8	1	0	3
111314	y4	0	1	2) Vancouver	1	0	0	0	1	0	0	3.8	1	0	4
111320	b	3	1	2) Vancouver	1	0	0	0	0	0	0	2.5	0	0	0
111320	y1	0	1	2) Vancouver	1	0	1	0	1	0	0	2.5	0	0	1
111320	y2	0	1	2) Vancouver	1	0	0	0	1	0	0	2.5	0	0	2
111320	y3	1	1	2) Vancouver	1	0	0	0	1	0	0	2.5	0	0	3
111320	y4	0	1	2) Vancouver	1	0	0	0	0	0	0	2.5	0	0	4
111321	b	2	1	2) Vancouver	1	1	1	1	1	1	1	3.1	1	0	0
111321	y2	1	1	2) Vancouver	1	1	0	0	1	0	0	3.1	1	0	2
111321	y3	1	1	2) Vancouver	1	1	0	0	1	0	0	3.1	1	0	3
111322	b	3	1	2) Vancouver	1	1	1	1	1	1	1	4.3	0	0	0
111322	y1	1	1	2) Vancouver	1	1	1	1	1	1	1	4.3	0	0	1
111322	y2	3	1	2) Vancouver	1	1	0	1	1	1	1	4.3	0	1	2
111322	y3	2	1	2) Vancouver	1	1	1	1	1	1	1	4.3	0	0	3
111322	y4	2	1	2) Vancouver	1	1	1	0	1	1	1	4.3	0	1	4
111323	b	4	0	2) Vancouver	1	1	0	0	0	0	0	5.4	1	0	0
111323	y1	0	0	2) Vancouver	1	1	0	0	0	0	0	5.4	1	0	1
111323	y2	0	0	2) Vancouver	1	1	0	0	0	0	0	5.4	1	0	2
111323	y3	1	0	2) Vancouver	1	1	0	0	0	0	0	5.4	1	0	3
111323	y4	0	0	2) Vancouver	1	1	0	0	0	0	0	5.4	1	0	4
111330	b	2	1	2) Vancouver	1	1	0	1	1	1	1	4.5	0	0	0
111330	y1	2	1	2) Vancouver	1	1	0	1	1	1	1	4.5	0	0	1
111330	y2	2	1	2) Vancouver	1	1	1	1	1	0	1	4.5	0	0	2
111330	y3	1	1	2) Vancouver	1	1	1	1	1	1	1	4.5	0	0	3
111331	b	3	0	2) Vancouver	0	1	1	0	0	0	0	5.2	1	0	0
111331	y1	0	0	2) Vancouver	0	1	1	0	0	0	0	5.2	1	0	1
111331	y2	2	0	2) Vancouver	0	1	0	0	0	0	0	5.2	1	0	2
111331	y3	3	0	2) Vancouver	0	1	0	0	0	0	0	5.2	1	0	3
111331	y4	0	0	2) Vancouver	0	1	0	0	0	0	0	5.2	1	0	4
111335	b	2	1	2) Vancouver	1	1	1	0	1	0	0	4.5	1	0	0
111335	y1	3	1	2) Vancouver	1	1	1	0	0	0	0	4.5	1	0	1
111335	y2	0	1	2) Vancouver	1	1	0	0	0	0	0	4.5	1	0	2
111335	y3	3	1	2) Vancouver	1	1	1	0	0	0	0	4.5	1	1	3
111335	y4	1	1	2) Vancouver	1	1	1	0	0	0	0	4.5	1	0	4
111336	b	2	1	2) Vancouver	0	1	0	0	1	0	0	3.7	0	0	0
111336	y2	1	1	2) Vancouver	0	1	0	0	1	0	0	3.7	0	0	2
111336	y3	2	1	2) Vancouver	0	1	0	0	1	0	0	3.7	0	0	3
111336	y4	1	1	2) Vancouver	0	1	0	0	1	0	0	3.7	0	0	4
111337	b	2	1	2) Vancouver	1	1	0	1	1	0	1	2.7	0	0	0
111337	y1	1	1	2) Vancouver	1	1	0	0	0	0	0	2.7	0	0	1
111337	y2	1	1	2) Vancouver	1	1	0	0	0	0	0	2.7	0	0	2
111337	y3	1	1	2) Vancouver	1	1	0	0	0	0	0	2.7	0	0	3
111337	y4	1	1	2) Vancouver	1	1	0	0	0	0	0	2.7	0	0	4
111338	b	2	0	2) Vancouver	1	1	0	0	1	0	0	4.5	1	0	0
111338	y1	2	0	2) Vancouver	1	1	0	1	1	1	1	4.5	1	0	1
111338	y2	1	0	2) Vancouver	1	1	0	1	1	0	1	4.5	1	0	2
111338	y3	1	0	2) Vancouver	1	1	0	1	1	1	1	4.5	1	0	3
111338	y4	1	0	2) Vancouver	1	1	0	0	1	0	0	4.5	1	0	4
111339	b	1	0	2) Vancouver	1	0	0	1	0	1	1	4.8	1	0	0
111339	y1	0	0	2) Vancouver	1	0	1	0	0	1	1	4.8	1	0	1
111339	y2	0	0	2) Vancouver	1	0	1	0	0	0	0	4.8	1	0	2
111339	y3	2	0	2) Vancouver	1	0	0	0	0	0	0	4.8	1	0	3
111339	y4	0	0	2) Vancouver	1	0	0	0	0	0	0	4.8	1	0	4
111340	b	2	0	2) Vancouver	0	1	0	1	0	1	1	3.8	1	0	0
111340	y1	0	0	2) Vancouver	0	1	0	0	1	0	0	3.8	1	0	1
111340	y2	0	0	2) Vancouver	0	1	1	0	1	0	0	3.8	1	0	2
111340	y3	1	0	2) Vancouver	0	1	0	0	0	0	0	3.8	1	0	3
111340	y4	1	0	2) Vancouver	0	1	1	0	0	0	0	3.8	1	0	4
111341	b	3	0	2) Vancouver	0	1	1	1	0	1	1	3.4	0	0	0
111341	y1	2	0	2) Vancouver	0	1	0	1	1	1	1	3.4	0	1	1
111341	y2	1	0	2) Vancouver	0	1	1	0	1	0	0	3.4	0	0	2
111341	y3	1	0	2) Vancouver	0	1	1	1	1	1	1	3.4	0	0	3
111341	y4	3	0	2) Vancouver	0	1	0	1	1	1	1	3.4	0	0	4
111342	b	2	0	2) Vancouver	0	1	0	0	0	1	1	2.7	0	0	0
111342	y1	0	0	2) Vancouver	0	1	0	1	0	1	1	2.7	0	0	1
111342	y2	2	0	2) Vancouver	0	1	1	1	1	1	1	2.7	0	0	2
111342	y3	1	0	2) Vancouver	0	1	1	1	0	1	1	2.7	0	0	3
111342	y4	0	0	2) Vancouver	0	1	1	0	1	0	0	2.7	0	0	4
111343	b	2	0	2) Vancouver	1	1	1	0	0	1	1	2.6	1	0	0
111343	y2	1	0	2) Vancouver	1	1	0	0	1	0	0	2.6	1	0	2
111343	y3	1	0	2) Vancouver	1	1	1	0	0	0	0	2.6	1	0	3
111343	y4	2	0	2) Vancouver	1	1	1	0	0	0	0	2.6	1	0	4
111344	b	3	0	2) Vancouver	0	1	0	0	0	1	1	2.2	0	0	0
111344	y1	1	0	2) Vancouver	0	1	1	0	0	1	1	2.2	0	0	1
111344	y2	0	0	2) Vancouver	0	1	1	0	0	0	0	2.2	0	0	2
111344	y3	1	0	2) Vancouver	0	1	1	0	0	0	0	2.2	0	0	3
111344	y4	2	0	2) Vancouver	0	1	1	0	0	0	0	2.2	0	1	4
111345	b	2	0	2) Vancouver	0	0	0	0	0	0	0	4.6	0	0	0
111345	y1	1	0	2) Vancouver	0	0	1	0	0	0	0	4.6	0	0	1
111345	y2	0	0	2) Vancouver	0	0	1	0	0	0	0	4.6	0	0	2
111345	y3	1	0	2) Vancouver	0	0	1	0	0	0	0	4.6	0	0	3
111345	y4	0	0	2) Vancouver	0	0	1	0	0	0	0	4.6	0	0	4
111346	b	3	0	2) Vancouver	1	1	0	0	0	0	0	5.4	1	0	0
111346	y1	0	0	2) Vancouver	1	1	1	0	0	0	0	5.4	1	0	1
111346	y2	0	0	2) Vancouver	1	1	0	0	0	0	0	5.4	1	0	2
111351	b	2	0	2) Vancouver	1	1	1	0	1	0	0	5.5	1	0	0
111351	y1	0	0	2) Vancouver	1	1	0	1	1	0	1	5.5	1	0	1
111351	y2	0	0	2) Vancouver	1	1	1	0	1	0	0	5.5	1	0	2
111351	y3	1	0	2) Vancouver	1	1	1	0	1	0	0	5.5	1	0	3
111351	y4	0	0	2) Vancouver	1	1	1	0	1	0	0	5.5	1	0	4
111360	b	3	0	2) Vancouver	0	0	0	0	0	0	0	5.8	1	0	0
111360	y1	0	0	2) Vancouver	0	0	1	0	0	0	0	5.8	1	0	1
111360	y2	0	0	2) Vancouver	0	0	0	0	1	0	0	5.8	1	0	2
111360	y3	1	0	2) Vancouver	0	0	0	1	1	0	1	5.8	1	0	3
111360	y4	0	0	2) Vancouver	0	0	0	0	1	0	0	5.8	1	0	4
111361	b	3	0	2) Vancouver	1	1	1	1	1	1	1	4	1	0	0
111361	y1	0	0	2) Vancouver	1	1	0	0	1	0	0	4	1	0	1
111361	y2	0	0	2) Vancouver	1	1	0	0	1	0	0	4	1	0	2
111361	y3	3	0	2) Vancouver	1	1	0	1	1	0	1	4	1	1	3
111361	y4	5	0	2) Vancouver	1	1	1	0	1	0	0	4	1	0	4
111406	b	4	1	2) Vancouver	1	1	0	0	1	1	1	4.4	0	0	0
111406	y1	1	1	2) Vancouver	1	1	0	0	0	0	0	4.4	0	0	1
111406	y2	0	1	2) Vancouver	1	1	0	0	1	0	0	4.4	0	0	2
111406	y3	1	1	2) Vancouver	1	1	0	0	1	0	0	4.4	0	0	3
111406	y4	1	1	2) Vancouver	1	1	0	0	0	0	0	4.4	0	0	4
111412	b	3	0	2) Vancouver	0	1	0	0	1	0	0	3.9	0	0	0
111412	y1	4	0	2) Vancouver	0	1	0	1	0	1	1	3.9	0	1	1
111412	y3	0	0	2) Vancouver	0	1	1	0	0	0	0	3.9	0	0	3
111412	y4	0	0	2) Vancouver	0	1	1	0	1	0	0	3.9	0	0	4
111415	b	2	0	2) Vancouver	1	1	0	0	0	0	0	4.6	0	0	0
111415	y1	0	0	2) Vancouver	1	1	0	0	0	0	0	4.6	0	0	1
111415	y2	2	0	2) Vancouver	1	1	0	0	0	0	0	4.6	0	0	2
111415	y3	2	0	2) Vancouver	1	1	0	0	0	0	0	4.6	0	0	3
111415	y4	0	0	2) Vancouver	1	1	0	0	0	0	0	4.6	0	0	4
112002	b	4	1	2) Vancouver	1	0	0	0	0	0	0	3.6	0	1	0
112002	y1	2	1	2) Vancouver	1	0	0	0	1	0	0	3.6	0	1	1
112002	y2	2	1	2) Vancouver	1	0	0	0	1	0	0	3.6	0	0	2
112002	y3	1	1	2) Vancouver	1	0	0	0	1	0	0	3.6	0	0	3
112002	y4	0	1	2) Vancouver	1	0	0	0	0	0	0	3.6	0	0	4
112003	b	3	0	2) Vancouver	1	1		0	1	0	0	5		1	0
112003	y1	1	0	2) Vancouver	1	1	0	0	0	0	0	5		0	1
112003	y2	0	0	2) Vancouver	1	1	0	0	0	0	0	5		0	2
112003	y3	1	0	2) Vancouver	1	1	0	0	0	0	0	5		0	3
112003	y4	2	0	2) Vancouver	1	1	0	0	0	0	0	5		0	4
112004	b	2	1	2) Vancouver	1	0	0	0	1	0	0	4.7		1	0
112004	y1	1	1	2) Vancouver	1	0	0	0	0	0	0	4.7		0	1
112004	y2	0	1	2) Vancouver	1	0	0	0	0	0	0	4.7		0	2
112004	y3	1	1	2) Vancouver	1	0	0	0	0	0	0	4.7		0	3
112004	y4	0	1	2) Vancouver	1	0	0	0	0	0	0	4.7		0	4
112005	b	4	0	2) Vancouver	0	0	0	1	0	1	1	3.5	0	1	0
112005	y1	3	0	2) Vancouver	0	0	1	0	0	0	0	3.5	0	0	1
112005	y2	2	0	2) Vancouver	0	0	0	0	1	0	0	3.5	0	0	2
112005	y3	2	0	2) Vancouver	0	0	0	0	0	0	0	3.5	0	0	3
112005	y4	1	0	2) Vancouver	0	0	0	0	1	0	0	3.5	0	0	4
112006	b	2	0	2) Vancouver	0	0	0	1	0	1	1	1.9		1	0
112006	y4	3	0	2) Vancouver	0	0	1	1	1	0	1	1.9		0	4
112007	b	5	1	2) Vancouver	1	1	0	1	1	1	1	3.9	1	1	0
112007	y1	2	1	2) Vancouver	1	1	1	0	1	0	0	3.9	1	1	1
112007	y2	2	1	2) Vancouver	1	1	1	0	1	0	0	3.9	1	0	2
112007	y3	1	1	2) Vancouver	1	1	1	0	0	0	0	3.9	1	0	3
112007	y4	0	1	2) Vancouver	1	1	0	0	1	0	0	3.9	1	0	4
112008	b	2	1	2) Vancouver	1	0	0	0	1	0	0	4.4	0	1	0
112008	y1	1	1	2) Vancouver	1	0	0	0	0	0	0	4.4	0	0	1
112008	y2	0	1	2) Vancouver	1	0	0	0	0	0	0	4.4	0	0	2
112008	y3	1	1	2) Vancouver	1	0	0	0	0	0	0	4.4	0	0	3
112008	y4	2	1	2) Vancouver	1	0	0	0	0	0	0	4.4	0	0	4
112009	b	2	1	2) Vancouver	1	1	0	1	0	1	1	5.5	1	1	0
112009	y1	2	1	2) Vancouver	1	1	0	1	0	1	1	5.5	1	0	1
112009	y2	3	1	2) Vancouver	1	1	0	1	0	1	1	5.5	1	0	2
112009	y3	1	1	2) Vancouver	1	1	0	1	0	1	1	5.5	1	0	3
112009	y4	2	1	2) Vancouver	1	1	0	1	0	1	1	5.5	1	0	4
112010	b	2	1	2) Vancouver	1	0	0	0	0	0	0	6.2	1	0	0
112010	y1	1	1	2) Vancouver	1	0	0	0	0	0	0	6.2	1	1	1
112011	b	4	1	2) Vancouver	1	1	1	0	0	0	0	5.5	1	1	0
112012	b	3	1	2) Vancouver	1		1	0	0	0	0	5.5	0	1	0
112012	y1	2	1	2) Vancouver	1		0	0	0	0	0	5.5	0	1	1
112012	y2	1	1	2) Vancouver	1		0	0	0	0	0	5.5	0	1	2
112013	b	3	1	2) Vancouver	1	0	0	0	0	0	0	4.6	0	1	0
112013	y1	3	1	2) Vancouver	1	0	0	0	0	0	0	4.6	0	0	1
112013	y2	0	1	2) Vancouver	1	0	0	0	0	0	0	4.6	0	0	2
112013	y3	1	1	2) Vancouver	1	0	0	0	0	0	0	4.6	0	0	3
112013	y4	1	1	2) Vancouver	1	0	0	0	0	0	0	4.6	0	0	4
112014	b	3	1	2) Vancouver	1	0	0	0	0	1	1	3.3	1	1	0
112014	y1	2	1	2) Vancouver	1	0	0	1	1	1	1	3.3	1	1	1
112014	y2	3	1	2) Vancouver	1	0	0	1	0	1	1	3.3	1	0	2
112014	y3	4	1	2) Vancouver	1	0	0	0	0	0	0	3.3	1	1	3
112014	y4	2	1	2) Vancouver	1	0	0	0	1	0	0	3.3	1	0	4
112015	b	3	0	2) Vancouver	1	0	0	0	0	0	0	5.9	0	1	0
112015	y1	1	0	2) Vancouver	1	0	0	0	0	0	0	5.9	0	0	1
112017	b	2	0	2) Vancouver	1	1	0	0	0	0	0	4.2	1	1	0
112017	y1	1	0	2) Vancouver	1	1	0	0	1	1	1	4.2	1	0	1
112017	y2	2	0	2) Vancouver	1	1	0	0	1	0	0	4.2	1	0	2
112017	y3	1	0	2) Vancouver	1	1	0	0	0	0	0	4.2	1	0	3
112017	y4	1	0	2) Vancouver	1	1		0	0	0	0	4.2	1	1	4
112018	b	6	0	2) Vancouver	1	1	1	0	0	0	0	4.9	1	1	0
112018	y1	1	0	2) Vancouver	1	1	1	1	0	1	1	4.9	1	0	1
112018	y2	1	0	2) Vancouver	1	1	1	0	0	0	0	4.9	1	0	2
112018	y3	2	0	2) Vancouver	1	1	0	0	0	0	0	4.9	1	0	3
112018	y4	2	0	2) Vancouver	1	1	0	0	0	0	0	4.9	1	0	4
112019	b	3	0	2) Vancouver	0	1	0	0	0	0	0	3.8	0	1	0
112019	y1	2	0	2) Vancouver	0	1	1	0	0	0	0	3.8	0	1	1
112019	y2	1	0	2) Vancouver	0	1	1	0	0	0	0	3.8	0	0	2
112019	y3	1	0	2) Vancouver	0	1	1	0	0	0	0	3.8	0	0	3
112019	y4	1	0	2) Vancouver	0	1	1	0	0	0	0	3.8	0	0	4
112020	b	4	0	2) Vancouver	1	0	0	0	0	0	0	5.4	1	1	0
112020	y1	2	0	2) Vancouver	1	0	0	0	0	0	0	5.4	1	0	1
112020	y2	0	0	2) Vancouver	1	0	0	0	0	0	0	5.4	1	0	2
112020	y3	1	0	2) Vancouver	1	0	0	0	0	0	0	5.4	1	0	3
112020	y4	0	0	2) Vancouver	1	0	0	0	0	1	1	5.4	1	0	4
112022	b	2	1	2) Vancouver	1	1	0	1	0	1	1	6.1	0	1	0
112022	y1	3	1	2) Vancouver	1	1	0	1	1	1	1	6.1	0	1	1
112022	y2	3	1	2) Vancouver	1	1	0	1	1	1	1	6.1	0	1	2
112022	y3	4	1	2) Vancouver	1	1	0	1	1	1	1	6.1	0	1	3
112022	y4	3	1	2) Vancouver	1	1	0	1	1	1	1	6.1	0	1	4
112023	b	4	0	2) Vancouver	0	0	1	0	0	0	0	2.7	1	1	0
112024	b	3	0	2) Vancouver	1	1	1	0	1	0	0	5.4	1	1	0
112024	y2	2	0	2) Vancouver	1	1	0	1	0	0	1	5.4	1	0	2
112024	y3	5	0	2) Vancouver	1	1	0	0	0	0	0	5.4	1	0	3
112024	y4	1	0	2) Vancouver	1	1	0	0	1	0	0	5.4	1	0	4
112025	b	5	1	2) Vancouver	1	1	1	0	0	0	0	4.7	0	1	0
112025	y1	1	1	2) Vancouver	1	1	1	0	1	1	1	4.7	0	0	1
112025	y2	2	1	2) Vancouver	1	1	1	1	1	0	1	4.7	0	0	2
112025	y3	1	1	2) Vancouver	1	1	0	0	1	1	1	4.7	0	0	3
112025	y4	2	1	2) Vancouver	1	1	0	1	0	1	1	4.7	0	1	4
112026	b	2	1	2) Vancouver	0	1	1	0	1	1	1	3.3	1	1	0
112026	y3	1	1	2) Vancouver	0	1	0	1	0	0	1	3.3	1	0	3
112026	y4	1	1	2) Vancouver	0	1	1	0	0	0	0	3.3	1	0	4
112027	b	4	1	2) Vancouver	0	1	0	0	1	0	0	5.2	1	1	0
112027	y1	2	1	2) Vancouver	0	1	0	0	0	0	0	5.2	1	0	1
112027	y2	1	1	2) Vancouver	0	1	0	0	0	0	0	5.2	1	0	2
112027	y3	3	1	2) Vancouver	0	1	0	0	0	0	0	5.2	1	0	3
112027	y4	0	1	2) Vancouver	0	1	1	0	0	0	0	5.2	1	0	4
112028	b	3	1	2) Vancouver	1	1	0	0	0	0	0	4.8	0	1	0
112028	y1	2	1	2) Vancouver	1	1	1	0	1	1	1	4.8	0	0	1
112028	y2	2	1	2) Vancouver	1	1	1	0	0	0	0	4.8	0	1	2
112028	y3	2	1	2) Vancouver	1	1	0	0	1	0	0	4.8	0	0	3
112028	y4	0	1	2) Vancouver	1	1	1	0	1	0	0	4.8	0	0	4
112029	b	3	1	2) Vancouver	1	0	0	0	0	0	0	4.1	0	1	0
112029	y1	2	1	2) Vancouver	1	0	0	0	0	0	0	4.1	0	0	1
112029	y2	1	1	2) Vancouver	1	0	0	0	1	0	0	4.1	0	0	2
112029	y3	3	1	2) Vancouver	1	0	0	0	1	0	0	4.1	0	0	3
112029	y4	0	1	2) Vancouver	1	0	0	0	1	0	0	4.1	0	0	4
112030	b	5	0	2) Vancouver	0	0	1	0	1	0	0	4.3	1	0	0
112030	y1	0	0	2) Vancouver	0	0	1	0	1	0	0	4.3	1	0	1
112030	y2	0	0	2) Vancouver	0	0	1	0	1	0	0	4.3	1	0	2
112030	y3	5	0	2) Vancouver	0	0	1	1	0	1	1	4.3	1	0	3
112030	y4	2	0	2) Vancouver	0	0	1	1	0	1	1	4.3	1	0	4
112031	b	2	0	2) Vancouver	0	1	0	1	0	1	1	6.6	1	1	0
112031	y1	1	0	2) Vancouver	0	1	0	0	0	0	0	6.6	1	0	1
112031	y2	0	0	2) Vancouver	0	1	0	0	0	0	0	6.6	1	0	2
112031	y3	2	0	2) Vancouver	0	1	0	1	0	1	1	6.6	1	0	3
112031	y4	3	0	2) Vancouver	0	1	0	0	0	1	1	6.6	1	0	4
112032	b	3	1	2) Vancouver	1	0	0	1	1	1	1	4.6	0	1	0
112032	y1	1	1	2) Vancouver	1	0	0	0	0	0	0	4.6	0	0	1
112032	y2	0	1	2) Vancouver	1	0	0	0	1	0	0	4.6	0	0	2
112032	y3	2	1	2) Vancouver	1	0	0	0	0	0	0	4.6	0	0	3
112032	y4	4	1	2) Vancouver	1	0	0	0	0	0	0	4.6	0	1	4
112033	b	2	0	2) Vancouver	1	1	0	0	0	0	0	3.2	1	1	0
112033	y1	3	0	2) Vancouver	1	1	0	0	1	0	0	3.2	1	0	1
112033	y2	1	0	2) Vancouver	1	1	0	1	0	1	1	3.2	1	0	2
112033	y3	2	0	2) Vancouver	1	1	0	1	1	1	1	3.2	1	0	3
112033	y4	0	0	2) Vancouver	1	1	0	0	1	0	0	3.2	1	0	4
112037	b	2	1	2) Vancouver	0	0	0	0	0	0	0	3.9	1	1	0
112037	y1	2	1	2) Vancouver	0	0	0	0	0	0	0	3.9	1	1	1
112037	y2	2	1	2) Vancouver	0	0	0	0	0	0	0	3.9	1	0	2
112037	y3	1	1	2) Vancouver	0	0	0	0	0	1	1	3.9	1	0	3
112037	y4	0	1	2) Vancouver	0	0	0	0	0	0	0	3.9	1	0	4
112038	b	3	0	2) Vancouver	0	0	1	0	0	0	0	5	1	1	0
112038	y3	2	0	2) Vancouver	0	0	1	0	0	0	0	5	1	1	3
112038	y4	1	0	2) Vancouver	0	0	0	0	0	0	0	5	1	0	4
112040	b	2	0	2) Vancouver	1	1	1	1	0	1	1	4.4	1	1	0
112040	y1	3	0	2) Vancouver	1	1	1	1	1	1	1	4.4	1	1	1
112040	y2	2	0	2) Vancouver	1	1	1	1	0	1	1	4.4	1	1	2
112040	y3	3	0	2) Vancouver	1	1	0	0	0	0	0	4.4	1	0	3
112040	y4	6	0	2) Vancouver	1	1	0	1	1	1	1	4.4	1	0	4
112041	b	3	1	2) Vancouver	1	0	1	0	1	0	0	3.3	0	1	0
112041	y1	1	1	2) Vancouver	1	0	0	0	0	0	0	3.3	0	0	1
112041	y2	0	1	2) Vancouver	1	0	1	0	1	0	0	3.3	0	0	2
112041	y3	1	1	2) Vancouver	1	0	1	0	0	0	0	3.3	0	0	3
112041	y4	0	1	2) Vancouver	1	0	1	0	0	0	0	3.3	0	0	4
112042	b	4	1	2) Vancouver	1	0	0	0	0	0	0	2.9	0	1	0
112042	y1	3	1	2) Vancouver	1	0	0	1	1	0	1	2.9	0	0	1
112042	y2	0	1	2) Vancouver	1	0	0	0	0	0	0	2.9	0	0	2
112042	y3	3	1	2) Vancouver	1	0	0	0	0	0	0	2.9	0	0	3
112042	y4	1	1	2) Vancouver	1	0	0	0	0	0	0	2.9	0	0	4
112043	b	2	0	2) Vancouver	1	1	0	0	1	0	0	3.4	1	1	0
112043	y2	2	0	2) Vancouver	1	1	0	0	1	0	0	3.4	1	1	2
112043	y3	3	0	2) Vancouver	1	1	0	0	1	0	0	3.4	1	0	3
112043	y4	1	0	2) Vancouver	1	1	0	0	1	0	0	3.4	1	0	4
112045	b	2	0	2) Vancouver	0	1	1	0	0	1	1	2	0	1	0
112045	y1	2	0	2) Vancouver	0	1	0	0	1	1	1	2	0	0	1
112045	y2	0	0	2) Vancouver	0	1	1	0	0	0	0	2	0	0	2
112045	y3	1	0	2) Vancouver	0	1	1	0	0	0	0	2	0	0	3
112045	y4	0	0	2) Vancouver	0	1	1	0	0	0	0	2	0	0	4
112046	b	3	0	2) Vancouver	0	0	1	0	0	0	0	3.8	1	1	0
112046	y1	2	0	2) Vancouver	0	0	1	0	0	0	0	3.8	1	1	1
112046	y2	1	0	2) Vancouver	0	0	1	0	0	0	0	3.8	1	1	2
112046	y3	3	0	2) Vancouver	0	0		0	0	0	0	3.8	1	0	3
112046	y4	0	0	2) Vancouver	0	0	0	1	0	1	1	3.8	1	0	4
112047	b	2	0	2) Vancouver	1	1	0	0	0	0	0	3	0	1	0
112047	y1	2	0	2) Vancouver	1	1	0	0	0	0	0	3	0	0	1
112047	y2	0	0	2) Vancouver	1	1	1	0	0	0	0	3	0	0	2
112047	y3	1	0	2) Vancouver	1	1	1	0	1	0	0	3	0	0	3
112047	y4	0	0	2) Vancouver	1	1	1	0	0	0	0	3	0	0	4
112048	b	4	0	2) Vancouver	1	0	1	0	0	0	0	4.6	0	1	0
112048	y1	2	0	2) Vancouver	1	0	1	0	0	0	0	4.6	0	0	1
112048	y2	1	0	2) Vancouver	1	0	1	1	1	1	1	4.6	0	1	2
112048	y3	4	0	2) Vancouver	1	0	0	1	0	0	1	4.6	0	0	3
112048	y4	1	0	2) Vancouver	1	0	0	0	0	0	0	4.6	0	0	4
112049	b	3	0	2) Vancouver	1	0	1	1	0	0	1	2.5	0	1	0
112049	y2	3	0	2) Vancouver	1	0	0	1	0	1	1	2.5	0	0	2
112049	y3	4	0	2) Vancouver	1	0	0	1	1	1	1	2.5	0	0	3
112049	y4	4	0	2) Vancouver	1	0	0	1	1	1	1	2.5	0	0	4
112050	b	3	0	2) Vancouver	0	0	0	1	1	1	1	3.1	1	1	0
112051	b	3	0	2) Vancouver	1	1	0	1	0	1	1	2.5	1	1	0
112051	y1	3	0	2) Vancouver	1	1	0	1	0	1	1	2.5	1	0	1
112051	y2	2	0	2) Vancouver	1	1	1	1	1	1	1	2.5	1	1	2
112051	y3	5	0	2) Vancouver	1	1	1	1	0	1	1	2.5	1	0	3
112051	y4	2	0	2) Vancouver	1	1	1	1	0	1	1	2.5	1	0	4
112052	b	2	1	2) Vancouver	1	1	0	1	1	1	1	3.5	1	1	0
112052	y3	3	1	2) Vancouver	1	1	0	0	1	0	0	3.5	1	0	3
112052	y4	1	1	2) Vancouver	1	1	0	0	1	0	0	3.5	1	1	4
112053	b	3	1	2) Vancouver	1	1	0	0	1	1	1	2.9	0	1	0
112053	y2	6	1	2) Vancouver	1	1	1	1	1	1	1	2.9	0	0	2
112053	y3	2	1	2) Vancouver	1	1	1	0	1	1	1	2.9	0	0	3
112053	y4	2	1	2) Vancouver	1	1	1	0	0	0	0	2.9	0	0	4
112054	b	4	0	2) Vancouver	1	1	1	0	0	0	0	2	1	1	0
112054	y1	1	0	2) Vancouver	1	1	1	0	0	0	0	2	1	0	1
112054	y2	0	0	2) Vancouver	1	1	1	0	0	1	1	2	1	0	2
112054	y3	1	0	2) Vancouver	1	1	1	0	0	0	0	2	1	0	3
112054	y4	0	0	2) Vancouver	1	1	1	0	0	0	0	2	1	0	4
112055	b	1	0	2) Vancouver	1	1	1	0	1	1	1	2.4	1	1	0
112055	y1	3	0	2) Vancouver	1	1	0	0	1	0	0	2.4	1	0	1
112055	y2	2	0	2) Vancouver	1	1	1	0	0	0	0	2.4	1	0	2
112055	y3	2	0	2) Vancouver	1	1	1	0	0	0	0	2.4	1	0	3
112060	b	6	0	2) Vancouver	0	1	1	0	1	0	0	5.3	1	1	0
112060	y1	4	0	2) Vancouver	0	1	1	0	1	1	1	5.3	1	0	1
112060	y2	0	0	2) Vancouver	0	1	1	0	1	0	0	5.3	1	0	2
112060	y3	1	0	2) Vancouver	0	1	1	0	1	0	0	5.3	1	0	3
112060	y4	0	0	2) Vancouver	0	1	1	0	1	0	0	5.3	1	0	4
112061	b	3	0	2) Vancouver	0	0	1	0	0	1	1	3.8	0	1	0
112061	y1	4	0	2) Vancouver	0	0	1	0	0	0	0	3.8	0	0	1
112061	y2	2	0	2) Vancouver	0	0	1	0	0	0	0	3.8	0	0	2
112062	b	2	0	2) Vancouver	0	0	1	0	0	0	0	4.5	0	1	0
112062	y1	2	0	2) Vancouver	0	0	1	0	0	0	0	4.5	0	0	1
112062	y2	0	0	2) Vancouver	0	0	1	0	1	0	0	4.5	0	0	2
112062	y3	1	0	2) Vancouver	0	0	1	0	0	0	0	4.5	0	0	3
112062	y4	1	0	2) Vancouver	0	0	1	0	0	0	0	4.5	0	0	4
112063	b	2	0	2) Vancouver	0	1	1	0	0	0	0	3.2	0	1	0
112063	y2	3	0	2) Vancouver	0	1	1	0	0	0	0	3.2	0	0	2
112063	y3	2	0	2) Vancouver	0	1	0	0	1	0	0	3.2	0	0	3
112064	b	4	0	2) Vancouver	1	0	0	0	1	0	0	5	0	1	0
112064	y1	3	0	2) Vancouver	1	0	0	0	0	0	0	5	0	0	1
112064	y2	0	0	2) Vancouver	1	0	0	0	1	0	0	5	0	0	2
112064	y3	1	0	2) Vancouver	1	0	0	0	1	0	0	5	0	0	3
112064	y4	0	0	2) Vancouver	1	0	0	0	1	0	0	5	0	0	4
112065	b	4	0	2) Vancouver	1	1	0	0	0	0	0	4.8	1	1	0
112065	y1	2	0	2) Vancouver	1	1	0	0	0	0	0	4.8	1	1	1
112065	y2	0	0	2) Vancouver	1	1	0	0	0	0	0	4.8	1	1	2
112065	y3	2	0	2) Vancouver	1	1	0	0	0	0	0	4.8	1	0	3
112065	y4	0	0	2) Vancouver	1	1	0	0	0	0	0	4.8	1	0	4
112066	b	3	0	2) Vancouver	0	0	1	0	0	0	0	4.7	1	1	0
112066	y1	3	0	2) Vancouver	0	0	1	0	0	0	0	4.7	1	0	1
112067	b	4	0	2) Vancouver	0	0	1	0	0	0	0	3.1	0	1	0
112067	y1	1	0	2) Vancouver	0	0	1	0	0	0	0	3.1	0	0	1
112067	y2	0	0	2) Vancouver	0	0	1	0	0	0	0	3.1	0	0	2
112067	y3	2	0	2) Vancouver	0	0	1	0	0	0	0	3.1	0	0	3
112067	y4	0	0	2) Vancouver	0	0	1	0	0	0	0	3.1	0	0	4
112068	b	2	0	2) Vancouver	1	1	1	0	0	0	0	5.5	1	1	0
112068	y1	1	0	2) Vancouver	1	1	0	0	0	0	0	5.5	1	0	1
112068	y2	0	0	2) Vancouver	1	1	0	0	0	0	0	5.5	1	0	2
112068	y3	1	0	2) Vancouver	1	1	1	0	0	0	0	5.5	1	0	3
112068	y4	0	0	2) Vancouver	1	1	0	0	0	0	0	5.5	1	0	4
112069	b	4	0	2) Vancouver	0	1	1	0	1	0	0	3.6	1	1	0
112070	b	1	0	2) Vancouver	0	1	1	0	0	0	0	2.6	1	1	0
112070	y1	1	0	2) Vancouver	0	1	0	0	0	0	0	2.6	1	0	1
112070	y2	3	0	2) Vancouver	0	1	0	0	0	0	0	2.6	1	0	2
112070	y3	3	0	2) Vancouver	0	1	0	0	0	1	1	2.6	1	0	3
112070	y4	0	0	2) Vancouver	0	1	0	0	0	0	0	2.6	1	0	4
112071	b	3	0	2) Vancouver	1	0	0	0	0	0	0	5.6	1	1	0
112071	y2	3	0	2) Vancouver	1	0	0	1	0	1	1	5.6	1	1	2
112071	y3	3	0	2) Vancouver	1	0	0	0	0	0	0	5.6	1	1	3
112072	b	4	0	2) Vancouver	0	1	0	0	1	0	0	5.5	1	1	0
112072	y1	3	0	2) Vancouver	0	1	1	0	0	0	0	5.5	1	0	1
112072	y2	0	0	2) Vancouver	0	1	1	0	0	0	0	5.5	1	0	2
112072	y3	4	0	2) Vancouver	0	1	1	0	0	1	1	5.5	1	1	3
112073	b	3	0	2) Vancouver	1	1	0	1	1	1	1	3.4	1	1	0
112073	y1	1	0	2) Vancouver	1	1	1	0	0	1	1	3.4	1	0	1
112073	y2	2	0	2) Vancouver	1	1	1	1	1	1	1	3.4	1	0	2
112073	y3	2	0	2) Vancouver	1	1	1	0	1	0	0	3.4	1	0	3
112073	y4	1	0	2) Vancouver	1	1	1	1	1	1	1	3.4	1	0	4
112074	b	2	0	2) Vancouver	1	0	0	1	0	1	1	3.1	0	1	0
112074	y1	3	0	2) Vancouver	1	0	1	0	0	0	0	3.1	0	0	1
112074	y2	2	0	2) Vancouver	1	0	0	0	0	0	0	3.1	0	1	2
112074	y3	3	0	2) Vancouver	1	0	0	0	0	0	0	3.1	0	0	3
112074	y4	5	0	2) Vancouver	1	0	0	1	0	1	1	3.1	0	0	4
112078	b	5	1	2) Vancouver	1	0	0	1	0	0	1	4	1	1	0
112078	y1	2	1	2) Vancouver	1	0	0	0	0	0	0	4	1	0	1
112078	y2	0	1	2) Vancouver	1	0	0	0	0	0	0	4	1	0	2
112078	y3	1	1	2) Vancouver	1	0	0	0	0	0	0	4	1	0	3
112078	y4	0	1	2) Vancouver	1	0	0	0	0	0	0	4	1	0	4
112080	b	4	0	2) Vancouver	1	0	0	1	1	1	1	4.4	1	1	0
112080	y1	2	0	2) Vancouver	1	0	1	0	0	0	0	4.4	1	0	1
112080	y3	2	0	2) Vancouver	1	0	1	0	1	0	0	4.4	1	0	3
112080	y4	2	0	2) Vancouver	1	0	0	1	1	1	1	4.4	1	1	4
112081	b	2	1	2) Vancouver	1	0	0	0	1	1	1	4.7	0	1	0
112081	y1	1	1	2) Vancouver	1	0	1	1	0	1	1	4.7	0	0	1
112081	y2	0	1	2) Vancouver	1	0	0	0	1	1	1	4.7	0	0	2
112081	y3	1	1	2) Vancouver	1	0	0	0	0	1	1	4.7	0	0	3
112081	y4	0	1	2) Vancouver	1	0	1	0	1	1	1	4.7	0	0	4
112084	b	5	1	2) Vancouver	1	0	0	0	0	0	0	4.3	1	1	0
112084	y1	1	1	2) Vancouver	1	0	1	0	0	0	0	4.3	1	0	1
112084	y2	0	1	2) Vancouver	1	0	0	1	0	1	1	4.3	1	0	2
112084	y3	1	1	2) Vancouver	1	0	0	0	0	0	0	4.3	1	0	3
112084	y4	1	1	2) Vancouver	1	0	0	0	0	0	0	4.3	1	0	4
112085	b	2	0	2) Vancouver	1	1	1	1	1	1	1	3.6	0	1	0
112085	y1	3	0	2) Vancouver	1	1	1	0	1	1	1	3.6	0	0	1
112085	y2	1	0	2) Vancouver	1	1	0	0	0	0	0	3.6	0	0	2
112085	y3	2	0	2) Vancouver	1	1	0	0	0	0	0	3.6	0	0	3
112085	y4	0	0	2) Vancouver	1	1	0	0	0	0	0	3.6	0	0	4
112086	b	4	0	2) Vancouver	0	0	1	0	0	1	1	2.2	0	1	0
112086	y1	2	0	2) Vancouver	0	0	1	1	1	1	1	2.2	0	0	1
112086	y2	2	0	2) Vancouver	0	0	1	1	1	1	1	2.2	0	0	2
112086	y3	3	0	2) Vancouver	0	0	0	1	1	1	1	2.2	0	0	3
112086	y4	0	0	2) Vancouver	0	0	0	1	0	1	1	2.2	0	0	4
112087	b	2	1	2) Vancouver	1	1	0	0	1	0	0	2.9	1	1	0
112087	y1	1	1	2) Vancouver	1	1	0	0	0	0	0	2.9	1	0	1
112087	y2	0	1	2) Vancouver	1	1	1	0	0	0	0	2.9	1	0	2
112087	y3	1	1	2) Vancouver	1	1	1	0	0	0	0	2.9	1	0	3
112087	y4	0	1	2) Vancouver	1	1	1	0	0	0	0	2.9	1	0	4
112089	b	3	0	2) Vancouver	1	1	0	0	0	0	0	2.8	1	1	0
112089	y1	2	0	2) Vancouver	1	1	0	0	0	0	0	2.8	1	0	1
112089	y2	0	0	2) Vancouver	1	1	1	0	0	0	0	2.8	1	0	2
112089	y3	1	0	2) Vancouver	1	1	0	0	0	0	0	2.8	1	0	3
112089	y4	0	0	2) Vancouver	1	1	1	0	0	0	0	2.8	1	0	4
112092	b	1	0	2) Vancouver	0	0	1	0	0	0	0	6.1	1	1	0
112092	y1	3	0	2) Vancouver	0	0	1	0	0	0	0	6.1	1	1	1
112092	y2	2	0	2) Vancouver	0	0	1	0	0	0	0	6.1	1	1	2
112092	y3	4	0	2) Vancouver	0	0	1	0	0	0	0	6.1	1	1	3
112092	y4	0	0	2) Vancouver	0	0	1	0	0	0	0	6.1	1	1	4
112093	b	4	0	2) Vancouver	1	1	1	1	1	1	1	4.4	1	1	0
112093	y2	2	0	2) Vancouver	1	1	1	1	1	0	1	4.4	1	0	2
112093	y3	4	0	2) Vancouver	1	1	0	0	1	0	0	4.4	1	0	3
112093	y4	2	0	2) Vancouver	1	1	0	0	0	0	0	4.4	1	0	4
112095	b	4	0	2) Vancouver	0	0	1	1	0	1	1	4	1	1	0
112095	y1	4	0	2) Vancouver	0	0	1	0	0	0	0	4	1	0	1
112095	y2	0	0	2) Vancouver	0	0	1	0	0	0	0	4	1	0	2
112095	y3	1	0	2) Vancouver	0	0	1	0	0	0	0	4	1	0	3
112095	y4	0	0	2) Vancouver	0	0	1	0	0	0	0	4	1	0	4
112096	b	5	0	2) Vancouver	0	0	1	0	1	0	0	3	1	1	0
112096	y2	2	0	2) Vancouver	0	0	1	1	1	0	1	3	1	1	2
112096	y3	4	0	2) Vancouver	0	0	0	0	1	0	0	3	1	1	3
112096	y4	3	0	2) Vancouver	0	0	1	1	1	1	1	3	1	1	4
112097	b	2	0	2) Vancouver	1	0	1	0	0	0	0	5.5	1	1	0
112097	y1	2	0	2) Vancouver	1	0	1	0	0	0	0	5.5	1	0	1
112097	y2	1	0	2) Vancouver	1	0	1	0	0	0	0	5.5	1	0	2
112097	y3	0	0	2) Vancouver	1	0	1	0	0	0	0	5.5	1	0	3
112097	y4	0	0	2) Vancouver	1	0	1	1	0	1	1	5.5	1	0	4
112100	b	3	0	2) Vancouver	0	0	0	1	1	1	1	4.7	1	1	0
112100	y1	1	0	2) Vancouver	0	0	0	0	1	0	0	4.7	1	0	1
112100	y2	0	0	2) Vancouver	0	0	0	0	1	0	0	4.7	1	0	2
112100	y3	1	0	2) Vancouver	0	0	0	0	1	0	0	4.7	1	0	3
112100	y4	0	0	2) Vancouver	0	0	0	1	1	0	1	4.7	1	0	4
112101	b	3	1	2) Vancouver	1	1	0	0	1	0	0	5.5	0	1	0
112101	y1	1	1	2) Vancouver	1	1	1	0	0	1	1	5.5	0	1	1
112101	y2	3	1	2) Vancouver	1	1	0	0	1	0	0	5.5	0	1	2
112101	y3	4	1	2) Vancouver	1	1	0	0	1	1	1	5.5	0	1	3
112102	b	4	1	2) Vancouver	0	1	0	0	1	0	0	2.2	1	1	0
112102	y1	3	1	2) Vancouver	0	1	0	0	1	0	0	2.2	1	0	1
112104	b	3	1	2) Vancouver	1	1	1	1	1	1	1	4.8	1	1	0
112104	y1	2	1	2) Vancouver	1	1	1	0	0	0	0	4.8	1	1	1
112104	y2	2	1	2) Vancouver	1	1	0	0	0	0	0	4.8	1	0	2
112104	y3	2	1	2) Vancouver	1	1	0	0	1	0	0	4.8	1	0	3
112104	y4	0	1	2) Vancouver	1	1	1	0	1	0	0	4.8	1	0	4
112105	b	3	1	2) Vancouver	1	0	0	1	0	1	1	3.7	0	1	0
112105	y2	2	1	2) Vancouver	1	0	0	0	0	0	0	3.7	0	0	2
112105	y3	1	1	2) Vancouver	1	0	1	0	0	0	0	3.7	0	0	3
112105	y4	1	1	2) Vancouver	1	0	1	0	0	0	0	3.7	0	0	4
112106	b	3	0	2) Vancouver	0	1	0	1	1	1	1	3.6	1	1	0
112106	y1	3	0	2) Vancouver	0	1	0	1	0	1	1	3.6	1	0	1
112106	y2	0	0	2) Vancouver	0	1	1	1	0	1	1	3.6	1	0	2
112106	y3	1	0	2) Vancouver	0	1	0	0	0	0	0	3.6	1	0	3
112106	y4	0	0	2) Vancouver	0	1	1	0	0	0	0	3.6	1	0	4
112107	b	3	0	2) Vancouver	0	1	1	0	0	0	0	3.2	1	1	0
112107	y1	3	0	2) Vancouver	0	1	1	0	1	0	0	3.2	1	0	1
112108	b	1	1	2) Vancouver	0	0	0	0	0	0	0	3.9		1	0
112108	y1	1	1	2) Vancouver	0	0	0	0	1	0	0	3.9		1	1
112108	y2	1	1	2) Vancouver	0	0	0	0	1	0	0	3.9		1	2
112108	y3	1	1	2) Vancouver	0	0	0	0	1	0	0	3.9		1	3
112108	y4	1	1	2) Vancouver	0	0	0	0	0	0	0	3.9		1	4
112109	b	3	1	2) Vancouver	1	1	0	0	1	1	1	4.7	0	1	0
112109	y1	3	1	2) Vancouver	1	1	1	0	1	1	1	4.7	0	1	1
112109	y2	1	1	2) Vancouver	1	1	0	0	1	0	0	4.7	0	1	2
112109	y3	1	1	2) Vancouver	1	1	1	0	0	0	0	4.7	0	0	3
112109	y4	0	1	2) Vancouver	1	1	0	0	0	0	0	4.7	0	0	4
112111	b	3	0	2) Vancouver	0	1	1	0	0	0	0	4.4	0	1	0
112112	b	2	0	2) Vancouver	0	0	1	0	0	0	0	4.3	1	1	0
112112	y1	3	0	2) Vancouver	0	0	1	0	0	0	0	4.3	1	1	1
112112	y2	3	0	2) Vancouver	0	0	1	0	0	0	0	4.3	1	0	2
112112	y3	1	0	2) Vancouver	0	0	1	1	0	1	1	4.3	1	0	3
112112	y4	1	0	2) Vancouver	0	0	1	0	0	1	1	4.3	1	0	4
112120	b	3	0	2) Vancouver	1	0	1	0	0	1	1	2.5	1	1	0
112120	y1	2	0	2) Vancouver	1	0	0	0	0	1	1	2.5	1	0	1
112120	y2	1	0	2) Vancouver	1	0	1	1	0	1	1	2.5	1	0	2
112120	y3	3	0	2) Vancouver	1	0	1	0	0	0	0	2.5	1	1	3
112120	y4	0	0	2) Vancouver	1	0	1	0	0	0	0	2.5	1	1	4
112122	b	1	1	2) Vancouver	0	0	1	0	0	1	1	4.5	1	1	0
112122	y1	1	1	2) Vancouver	0	0	0	0	0	0	0	4.5	1	0	1
112122	y2	0	1	2) Vancouver	0	0	1	0	0	0	0	4.5	1	0	2
112122	y3	1	1	2) Vancouver	0	0	0	0	0	0	0	4.5	1	0	3
112122	y4	0	1	2) Vancouver	0	0	1	0	0	0	0	4.5	1	0	4
112123	b	3	0	2) Vancouver	0	0	1	0	0	0	0	3	0	1	0
112123	y1	1	0	2) Vancouver	0	0	1	0	0	0	0	3	0	1	1
112123	y2	3	0	2) Vancouver	0	0	0	1	0	1	1	3	0	1	2
112123	y3	2	0	2) Vancouver	0	0	1	1	1	1	1	3	0	1	3
112123	y4	3	0	2) Vancouver	0	0	0	0	1	0	0	3	0	1	4
112130	b	3	1	2) Vancouver	0	0	0	0	0	0	0	5.8	1	1	0
112130	y1	1	1	2) Vancouver	0	0	0	0	0	0	0	5.8	1	1	1
112130	y2	2	1	2) Vancouver	0	0	0	0	0	0	0	5.8	1	0	2
112130	y3	2	1	2) Vancouver	0	0	0	0	0	0	0	5.8	1	1	3
112133	b	3	1	2) Vancouver	1	0	0	1	1	1	1	4.8	0	1	0
112133	y1	1	1	2) Vancouver	1	0	0	0	1	0	0	4.8	0	0	1
112133	y2	2	1	2) Vancouver	1	0	0	0	1	0	0	4.8	0	1	2
112133	y3	2	1	2) Vancouver	1	0	0	0	1	0	0	4.8	0	0	3
112133	y4	0	1	2) Vancouver	1	0	0	0	1	0	0	4.8	0	0	4
112134	b	2	1	2) Vancouver	1	1	0	0	0	1	1	2.9	0	1	0
112134	y1	2	1	2) Vancouver	1	1	0	0	1	0	0	2.9	0	1	1
112134	y2	5	1	2) Vancouver	1	1	0	0	0	0	0	2.9	0	0	2
112134	y3	2	1	2) Vancouver	1	1	0	0	1	0	0	2.9	0	0	3
112135	b	3	1	2) Vancouver	1	0	0	1	1	1	1	5.9	0	1	0
112135	y2	1	1	2) Vancouver	1	0	0	0	1	0	0	5.9	0	0	2
112135	y3	1	1	2) Vancouver	1	0	0	0	0	0	0	5.9	0	0	3
112135	y4	2	1	2) Vancouver	1	0	0	0	0	0	0	5.9	0	1	4
112136	b	2	1	2) Vancouver	1	0	0	1	1	1	1	4.1	0	1	0
112136	y1	1	1	2) Vancouver	1	0	0	0	0	0	0	4.1	0	0	1
112136	y2	2	1	2) Vancouver	1	0	1	0	0	0	0	4.1	0	0	2
112136	y3	1	1	2) Vancouver	1	0	1	0	0	0	0	4.1	0	0	3
112136	y4	0	1	2) Vancouver	1	0	1	1	0	1	1	4.1	0	0	4
112137	b	2	1	2) Vancouver	1	1	0	0	0	1	1	4.6	0	1	0
112137	y1	2	1	2) Vancouver	1	1	0	0	0	0	0	4.6	0	0	1
112137	y2	0	1	2) Vancouver	1	1	0	0	0	0	0	4.6	0	0	2
112137	y3	1	1	2) Vancouver	1	1	0	0	0	0	0	4.6	0	0	3
112137	y4	0	1	2) Vancouver	1	1	0	0	0	0	0	4.6	0	0	4
112138	b	2	1	2) Vancouver	1	0	0	0	0	0	0	5.7	1	1	0
112138	y1	2	1	2) Vancouver	1	0	0	0	0	0	0	5.7	1	0	1
112138	y2	1	1	2) Vancouver	1	0	0	0	0	0	0	5.7	1	0	2
112138	y3	2	1	2) Vancouver	1	0	0	0	0	0	0	5.7	1	1	3
112138	y4	1	1	2) Vancouver	1	0	0	0	0	0	0	5.7	1	0	4
112139	b	1	1	2) Vancouver	0	0	0	0	1	0	0	3.7	0	1	0
112141	b	3	1	2) Vancouver	1	1	1	0	1	0	0	2.1	1	1	0
112141	y1	1	1	2) Vancouver	1	1	1	0	1	0	0	2.1	1	0	1
112141	y2	2	1	2) Vancouver	1	1	0	1	1	1	1	2.1	1	0	2
112141	y3	2	1	2) Vancouver	1	1	1	0	0	0	0	2.1	1	0	3
112141	y4	2	1	2) Vancouver	1	1	0	0	0	0	0	2.1	1	0	4
112147	b	3	0	2) Vancouver	0	0	0	0	0	1	1	2.2	1	1	0
112147	y3	2	0	2) Vancouver	0	0	0	1	0	1	1	2.2	1	0	3
112147	y4	1	0	2) Vancouver	0	0	1	0	0	1	1	2.2	1	0	4
112148	b	4	1	2) Vancouver	0	0	0	0	0	1	1	2.3	1	1	0
112148	y1	2	1	2) Vancouver	0	0	0	1	0	1	1	2.3	1	0	1
112148	y2	0	1	2) Vancouver	0	0	0	0	1	1	1	2.3	1	0	2
112148	y3	1	1	2) Vancouver	0	0	0	0	0	0	0	2.3	1	0	3
112148	y4	0	1	2) Vancouver	0	0	0	0	1	0	0	2.3	1	0	4
112152	b	3	1	2) Vancouver	0	1	0	1	0		1	3.5	1	1	0
112152	y1	1	1	2) Vancouver	0	1	1	0	0	0	0	3.5	1	0	1
112152	y2	2	1	2) Vancouver	0	1	1	0	0	0	0	3.5	1	1	2
112153	b	3	1	2) Vancouver	1	1	0	0	1	0	0	4.7	1	1	0
112153	y1	1	1	2) Vancouver	1	1	0	0	1	0	0	4.7	1	0	1
112153	y2	0	1	2) Vancouver	1	1	0	0	0	0	0	4.7	1	0	2
112153	y3	1	1	2) Vancouver	1	1	0	0	1	0	0	4.7	1	0	3
112153	y4	1	1	2) Vancouver	1	1	0	0	1	0	0	4.7	1	0	4
112160	b	3	0	2) Vancouver	0	1	0	0	0	0	0	6.6	0	1	0
112160	y2	1	0	2) Vancouver	0	1	0		0	0	0	6.6	0	1	2
112160	y3	4	0	2) Vancouver	0	1	0	0	0	0	0	6.6	0	1	3
112160	y4	3	0	2) Vancouver	0	1	0	0	0	0	0	6.6	0	1	4
112161	b	4	0	2) Vancouver	0	1	0	0	0	0	0	5.3	1	1	0
112161	y2	2	0	2) Vancouver	0	1	0	1	0	1	1	5.3	1	0	2
112161	y3	1	0	2) Vancouver	0	1	0	0	0	0	0	5.3	1	0	3
112161	y4	0	0	2) Vancouver	0	1	0	0	0	0	0	5.3	1	0	4
112163	b	3	0	2) Vancouver	1	1	0	0	1	0	0	3.7	1	1	0
112163	y1	1	0	2) Vancouver	1	1	0	0	0	0	0	3.7	1	0	1
112163	y2	0	0	2) Vancouver	1	1	0	0	0	0	0	3.7	1	0	2
112163	y3	2	0	2) Vancouver	1	1	0	0	0	0	0	3.7	1	0	3
112163	y4	2	0	2) Vancouver	1	1	0	0	0	0	0	3.7	1	0	4
112165	b	4	0	2) Vancouver	0	1	0	0	0	1	1	2.2	1	1	0
112165	y2	2	0	2) Vancouver	0	1	0	1	1	1	1	2.2	1	0	2
112166	b	3	1	2) Vancouver	0	1	1	1	0	1	1	2.2	0	1	0
112166	y2	2	1	2) Vancouver	0	1	1	0	0	0	0	2.2	0	0	2
112166	y3	1	1	2) Vancouver	0	1	0	0	0	0	0	2.2	0	0	3
112167	b	5	0	2) Vancouver	0	0	1	0	0	0	0	3.4	1	1	0
112169	b	4	0	2) Vancouver	1	1	0	1	0	1	1	3.4	1	1	0
112169	y1	1	0	2) Vancouver	1	1	0	1	0	1	1	3.4	1	0	1
112169	y2	2	0	2) Vancouver	1	1	0	1	0	1	1	3.4	1	0	2
112169	y3	1	0	2) Vancouver	1	1	0	0	0	0	0	3.4	1	0	3
112169	y4	0	0	2) Vancouver	1	1	0	0	0	0	0	3.4	1	0	4
112173	b	2	1	2) Vancouver	1	1	0	0	0	0	0	6.2	0	1	0
112177	b	5	1	2) Vancouver	0	1	0	0	1	0	0	4.2	1	1	0
112177	y1	2	1	2) Vancouver	0	1	0	0	1	0	0	4.2	1	1	1
112177	y2	2	1	2) Vancouver	0	1	0	0	1	0	0	4.2	1	1	2
112177	y3	1	1	2) Vancouver	0	1	0	0	0	0	0	4.2	1	1	3
112177	y4	1	1	2) Vancouver	0	1	0	0	0	0	0	4.2	1	1	4
112178	b	2	1	2) Vancouver	0	1	0	0	1	1	1	4.6	0	1	0
112178	y1	1	1	2) Vancouver	0	1	0	0	0	0	0	4.6	0	0	1
112178	y2	2	1	2) Vancouver	0	1	0	0	0	0	0	4.6	0	0	2
112178	y3	1	1	2) Vancouver	0	1	0	0	0	0	0	4.6	0	0	3
112178	y4	0	1	2) Vancouver	0	1	0	1	0	1	1	4.6	0	0	4
112211	b	3	1	2) Vancouver	0	1	1	0	1	0	0	3.7	1	1	0
112211	y1	2	1	2) Vancouver	0	1	0	1	1	1	1	3.7	1	0	1
112211	y2	3	1	2) Vancouver	0	1	0	1	1	1	1	3.7	1	0	2
112211	y3	1	1	2) Vancouver	0	1	0	0	0	0	0	3.7	1	0	3
112211	y4	0	1	2) Vancouver	0	1	1	0	0	0	0	3.7	1	0	4
112220	b	3	0	2) Vancouver	0	1	1	0	1	0	0	5.2	1	1	0
112220	y2	3	0	2) Vancouver	0	1	1	0	1	0	0	5.2	1	0	2
112220	y3	2	0	2) Vancouver	0	1	1	0	1	0	0	5.2	1	0	3
112220	y4	2	0	2) Vancouver	0	1	0	0	1	0	0	5.2	1	0	4
112221	b	3	0	2) Vancouver	0	0	1	0	0	0	0	3.4	1	1	0
112225	b	3	1	2) Vancouver	0	1	1	0	0	0	0	4.9	1	1	0
112225	y1	2	1	2) Vancouver	0	1	0	0	0	0	0	4.9	1	0	1
112225	y2	0	1	2) Vancouver	0	1	1	0	0	0	0	4.9	1	0	2
112225	y3	1	1	2) Vancouver	0	1	1	0	0	0	0	4.9	1	0	3
112225	y4	2	1	2) Vancouver	0	1	1	0	0	0	0	4.9	1	0	4
112226	b	3	1	2) Vancouver	1	0	0	0	0	0	0	7.2	1	1	0
112226	y2	3	1	2) Vancouver	1	0	0	0	0	0	0	7.2	1	0	2
112226	y3	1	1	2) Vancouver	1	0	0	0	0	0	0	7.2	1	0	3
112226	y4	0	1	2) Vancouver	1	0	0	0	0	0	0	7.2	1	0	4
112229	b	3	0	2) Vancouver	0	1	1	0	1	0	0	4.8		1	0
112230	b	2	0	2) Vancouver	0	0	1	0	0	0	0	5.3	1	1	0
112230	y1	2	0	2) Vancouver	0	0	1	0	0	0	0	5.3	1	1	1
112230	y2	1	0	2) Vancouver	0	0	1	0	0	0	0	5.3	1	0	2
112230	y3	1	0	2) Vancouver	0	0	1	0	0	0	0	5.3	1	0	3
112230	y4	0	0	2) Vancouver	0	0	1	0	0	0	0	5.3	1	0	4
112243	b	6	1	2) Vancouver	1	1	0	1	1	1	1	4.2	1	1	0
112243	y1	2	1	2) Vancouver	1	1	0	1	1	1	1	4.2	1	0	1
112244	b	3	0	2) Vancouver	0	0	1	0	0	0	0	5.9	1	1	0
112282	b	3	0	2) Vancouver	0	1	1	1	1	1	1	1.9	0	1	0
112282	y1	5	0	2) Vancouver	0	1	1	1	1	1	1	1.9	0	0	1
112282	y2	4	0	2) Vancouver	0	1	1	0	1	0	0	1.9	0	0	2
112282	y3	6	0	2) Vancouver	0	1	1	0	1	1	1	1.9	0	0	3
112282	y4	4	0	2) Vancouver	0	1	1	1	1	1	1	1.9	0	0	4
112355	b	2	0	2) Vancouver	0	1	1	0	0	0	0	5	1	1	0
112355	y1	2	0	2) Vancouver	0	1	1	0	0	0	0	5	1	0	1
112355	y2	1	0	2) Vancouver	0	1	1	0	0	0	0	5	1	0	2
112355	y3	1	0	2) Vancouver	0	1	1	0	0	0	0	5	1	0	3
112355	y4	0	0	2) Vancouver	0	1	1	0	0	0	0	5	1	0	4
112356	b	3	0	2) Vancouver	1	1	1	1	1	1	1	4.2	0	1	0
112356	y1	1	0	2) Vancouver	1	1	1	0	1	0	0	4.2	0	0	1
112356	y2	0	0	2) Vancouver	1	1	1	0	1	0	0	4.2	0	0	2
112356	y3	1	0	2) Vancouver	1	1	0	0	1	0	0	4.2	0	0	3
112356	y4	2	0	2) Vancouver	1	1	0	1	1	1	1	4.2	0	1	4
112357	b	3	0	2) Vancouver	0		1	0	1	0	0	2.4	0	1	0
112357	y1	2	0	2) Vancouver	0		1	0	0	0	0	2.4	0	0	1
112357	y2	2	0	2) Vancouver	0		1	0	0	0	0	2.4	0	0	2
112357	y3	1	0	2) Vancouver	0		1	0	0	0	0	2.4	0	0	3
112357	y4	1	0	2) Vancouver	0		1	0	0	0	0	2.4	0	0	4
112358	b	5	0	2) Vancouver	0	1	0	1	1	1	1	3.5	1	1	0
112358	y1	5	0	2) Vancouver	0	1	0	1	1	1	1	3.5	1	1	1
112359	b	2	1	2) Vancouver	1	1	1	0	0	0	0	3.4	1	1	0
112359	y1	3	1	2) Vancouver	1	1	0	0	0	0	0	3.4	1	0	1
112359	y2	3	1	2) Vancouver	1	1	0	0	0	0	0	3.4	1	0	2
112359	y3	1	1	2) Vancouver	1	1	0	0	0	0	0	3.4	1	0	3
112359	y4	0	1	2) Vancouver	1	1	0	0	0	0	0	3.4	1	0	4
112362	b	3	1	2) Vancouver	0	1	0	0	0	0	0	4.5	0	1	0
112362	y1	1	1	2) Vancouver	0	1	0	0	0	0	0	4.5	0	0	1
112362	y2	1	1	2) Vancouver	0	1	1	0	0	0	0	4.5	0	1	2
112362	y3	0	1	2) Vancouver	0	1	0	0	0	0	0	4.5	0	1	3
112362	y4	1	1	2) Vancouver	0	1	0	0	0	0	0	4.5	0	0	4
112363	b	2	1	2) Vancouver	1	0	1	0	0	0	0	5.5	0	1	0
112363	y1	1	1	2) Vancouver	1	0	0	0	0	0	0	5.5	0	1	1
112363	y2	4	1	2) Vancouver	1	0	0	0	0	0	0	5.5	0	1	2
112363	y3	4	1	2) Vancouver	1	0	1	0	0	0	0	5.5	0	1	3
112363	y4	4	1	2) Vancouver	1	0	0	0	0	0	0	5.5	0	0	4
112364	b	4	1	2) Vancouver	0	0	1	0	0	0	0	4.2	1	1	0
112364	y1	1	1	2) Vancouver	0	0	1	1	0	1	1	4.2	1	0	1
112364	y2	0	1	2) Vancouver	0	0	0	0	1	0	0	4.2	1	0	2
112364	y3	1	1	2) Vancouver	0	0	1	0	0	0	0	4.2	1	0	3
112364	y4	0	1	2) Vancouver	0	0	1	0	0	0	0	4.2	1	0	4
112386	b	2	0	2) Vancouver	1	1	1	0	0	0	0	5.7	0	1	0
112387	b	4	0	2) Vancouver	0	1	0	0	1	1	1	4.9	1	1	0
112387	y2	1	0	2) Vancouver	0	1	0	0	0	0	0	4.9	1	0	2
112387	y3	1	0	2) Vancouver	0	1	1	0	0	0	0	4.9	1	0	3
112388	b	5	0	2) Vancouver	0	1	1	0	0	0	0	4.2	1	1	0
112388	y1	1	0	2) Vancouver	0	1	1	0	0	0	0	4.2	1	1	1
112388	y2	3	0	2) Vancouver	0	1	1	0	0	0	0	4.2	1	1	2
112388	y3	2	0	2) Vancouver	0	1	1	0	0	0	0	4.2	1	0	3
112388	y4	0	0	2) Vancouver	0	1	1	0	0	0	0	4.2	1	0	4
112397	b	4	1	2) Vancouver	1	1	0	0	1	0	0	2.4	0	1	0
112397	y1	3	1	2) Vancouver	1	1	1	0	1	0	0	2.4	0	0	1
112397	y2	2	1	2) Vancouver	1	1	1	1	1	1	1	2.4	0	0	2
112408	b	2	0	2) Vancouver	0	1	0	0	0	0	0	4.5	1	0	0
112408	y1	0	0	2) Vancouver	0	1	0	1	0	1	1	4.5	1	0	1
112408	y2	0	0	2) Vancouver	0	1	1	0	0	0	0	4.5	1	0	2
112408	y3	1	0	2) Vancouver	0	1	1	0	0	0	0	4.5	1	0	3
112408	y4	0	0	2) Vancouver	0	1	1	0	0	0	0	4.5	1	0	4
112409	b	3	0	2) Vancouver	0	0	1	0	1	0	0	3.8	0	1	0
112409	y3	1	0	2) Vancouver	0	0	1	0	0	0	0	3.8	0	0	3
112411	b	2	0	2) Vancouver	1		1	1	0	1	1	3.3	1	1	0
112411	y1	4	0	2) Vancouver	1		0	0	0	1	1	3.3	1	1	1
112411	y2	5	0	2) Vancouver	1		1	1	1	1	1	3.3	1	0	2
112411	y3	4	0	2) Vancouver	1		1	0	0	0	0	3.3	1	1	3
112411	y4	5	0	2) Vancouver	1		0	1	0	1	1	3.3	1	1	4
113075	b	2	0	2) Vancouver	0	0	1	0	0	0	0	4.9	1	1	0
113075	y1	3	0	2) Vancouver	0	0	1	0	0	0	0	4.9	1	0	1
113075	y2	0	0	2) Vancouver	0	0	1	0	0	0	0	4.9	1	0	2
113075	y3	3	0	2) Vancouver	0	0	1	0	0	0	0	4.9	1	1	3
113075	y4	4	0	2) Vancouver	0	0	0	0	0	0	0	4.9	1	0	4
113117	b	2	0	2) Vancouver	0	0	1	0	1	1	1	3.3	0	1	0
113117	y1	1	0	2) Vancouver	0	0	1	1	1	1	1	3.3	0	0	1
113117	y2	0	0	2) Vancouver	0	0	1	1	0	1	1	3.3	0	0	2
113117	y3	2	0	2) Vancouver	0	0	1	1	1	1	1	3.3	0	0	3
113117	y4	4	0	2) Vancouver	0	0	1	0	1	0	0	3.3	0	1	4
113131	b	3	0	2) Vancouver	0	0	1	0	1	0	0	4.3	0	1	0
113131	y1	2	0	2) Vancouver	0	0	1	0	1	0	0	4.3	0	0	1
113131	y2	2	0	2) Vancouver	0	0	1	0	1	0	0	4.3	0	0	2
113131	y3	3	0	2) Vancouver	0	0	1	1	1	0	1	4.3	0	1	3
113131	y4	3	0	2) Vancouver	0	0	1	1	1	0	1	4.3	0	1	4
113132	b	3	0	2) Vancouver	0	0	0	0	0	0	0	4.8	1	1	0
113132	y1	3	0	2) Vancouver	0	0	0	0	0	0	0	4.8	1	1	1
113132	y2	1	0	2) Vancouver	0	0	1	1	0	1	1	4.8	1	1	2
113132	y3	1	0	2) Vancouver	0	0	1	1	1	1	1	4.8	1	1	3
113132	y4	2	0	2) Vancouver	0	0	1	0	1	1	1	4.8	1	1	4
113159	b	1	1	2) Vancouver	1	1	0	0	0	0	0	6	1	1	0
113159	y1	4	1	2) Vancouver	1	1	0	0	0	0	0	6	1	0	1
113159	y2	0	1	2) Vancouver	1	1	0	0	0	0	0	6	1	0	2
113159	y3	1	1	2) Vancouver	1	1	0	0	0	0	0	6	1	0	3
113159	y4	1	1	2) Vancouver	1	1	0	0	0	0	0	6	1	0	4
113164	b	2	0	2) Vancouver	0	0	1	0	1	0	0	4.6	0	1	0
113164	y3	4	0	2) Vancouver	0	0	1	0	0	0	0	4.6	0	1	3
113164	y4	3	0	2) Vancouver	0	0	1	0	0	0	0	4.6	0	0	4
113168	b	1	0	2) Vancouver	0	0	1	0	0	0	0	4.7	1	1	0
113168	y2	1	0	2) Vancouver	0	0	1	0	1	0	0	4.7	1	0	2
113168	y3	2	0	2) Vancouver	0	0	1	0	1	0	0	4.7	1	0	3
113168	y4	0	0	2) Vancouver	0	0	0	0	1	0	0	4.7	1	0	4
113170	b	1	0	2) Vancouver	1	0	1	0	1	0	0	4.9	1	1	0
113170	y1	2	0	2) Vancouver	1	0	1	0	1	0	0	4.9	1	1	1
113171	b	2	0	2) Vancouver	0	0	1	0	1	0	0	5.5	1	1	0
113171	y3	1	0	2) Vancouver	0	0	1	0	0	0	0	5.5	1	1	3
113171	y4	2	0	2) Vancouver	0	0	1	0	0	0	0	5.5	1	0	4
113172	b	3	0	2) Vancouver	1	1	0	1	1	1	1	3	0	1	0
113172	y1	1	0	2) Vancouver	1	1	1	1	1	1	1	3	0	0	1
113172	y2	0	0	2) Vancouver	1	1	1	0	1	0	0	3	0	0	2
113172	y3	1	0	2) Vancouver	1	1	1	0	1	0	0	3	0	0	3
113172	y4	1	0	2) Vancouver	1	1	1	0	1	0	0	3	0	0	4
113175	b	1	1	2) Vancouver	1	1	1	0	1	0	0	3.8	1	1	0
113175	y1	2	1	2) Vancouver	1	1	1	1	1	1	1	3.8	1	0	1
113175	y2	0	1	2) Vancouver	1	1	0	1	1	1	1	3.8	1	0	2
113175	y3	1	1	2) Vancouver	1	1	0	0	1	0	0	3.8	1	0	3
113175	y4	1	1	2) Vancouver	1	1	0	0	1	0	0	3.8	1	1	4
113176	b	2	0	2) Vancouver	1	0	1		0			4.9		1	0
113176	y1	2	0	2) Vancouver	1	0	0	0	0	0	0	4.9		1	1
113179	b	2	0	2) Vancouver	0	0	0	0	0	0	0	2.2	0	1	0
113179	y1	2	0	2) Vancouver	0	0	0	0	0	0	0	2.2	0	0	1
113192	b	1	0	2) Vancouver	0	0	0	1	0	1	1		1	1	0
113192	y2	2	0	2) Vancouver	0	0	0	1	1	1	1		1	1	2
113193	b	3	0	2) Vancouver	0	0	0	0	0	0	0	4.6	0	1	0
113193	y1	2	0	2) Vancouver	0	0	0	0	0	1	1	4.6	0	1	1
113193	y2	3	0	2) Vancouver	0	0	1	0	0	0	0	4.6	0	1	2
113193	y3	5	0	2) Vancouver	0	0	0	1	0	1	1	4.6	0	1	3
113194	b	1	0	2) Vancouver	0	0	0	0	0	0	0	4.5	0	1	0
113194	y1	3	0	2) Vancouver	0	0	0	0	0	0	0	4.5	0	1	1
113194	y2	1	0	2) Vancouver	0	0	0	0	0	0	0	4.5	0	1	2
113194	y3	1	0	2) Vancouver	0	0	0	0	0	0	0	4.5	0	1	3
113194	y4	0	0	2) Vancouver	0	0	0	0	0	0	0	4.5	0	1	4
113195	b	1	0	2) Vancouver	1	0	1	1	1	1	1	6.2	0	1	0
113195	y1	2	0	2) Vancouver	1	0	1	1	1	1	1	6.2	0	1	1
113195	y2	3	0	2) Vancouver	1	0	1	0	1	0	0	6.2	0	0	2
113195	y3	3	0	2) Vancouver	1	0	1	0	1	0	0	6.2	0	1	3
113195	y4	1	0	2) Vancouver	1	0	1	0	1	0	0	6.2	0	0	4
113214	b	3	1	2) Vancouver	0	0	1	0	1	0	0	4.2	0	1	0
113214	y2	1	1	2) Vancouver	0	0	0	0	0	0	0	4.2	0	0	2
113214	y3	1	1	2) Vancouver	0	0	0	0	0	0	0	4.2	0	0	3
113214	y4	0	1	2) Vancouver	0	0	0	0	0	0	0	4.2	0	0	4
113215	b	5	1	2) Vancouver	1	0	1	0	1	0	0	4.7	0	1	0
113215	y1	1	1	2) Vancouver	1	0	0	1	0	0	1	4.7	0	0	1
113215	y2	0	1	2) Vancouver	1	0	1	1	0	0	1	4.7	0	0	2
113241	b	2	0	2) Vancouver	1	0	1	1	0	1	1	3.9	0	1	0
113246	b	2	0	2) Vancouver	0	0	1	1	1	1	1	3.4	0	1	0
113246	y1	0	0	2) Vancouver	0	0	1	0	1	1	1	3.4	0	1	1
113246	y4	5	0	2) Vancouver	0	0	1	1	1	1	1	3.4	0	0	4
113264	b	2	0	2) Vancouver	0	1	1	0	0	0	0	3	1	1	0
113264	y1	3	0	2) Vancouver	0	1	0	0	0	0	0	3	1	1	1
113264	y2	1	0	2) Vancouver	0	1	0	0	0	0	0	3	1	0	2
113264	y3	2	0	2) Vancouver	0	1	1	1	0	1	1	3	1	0	3
113264	y4	1	0	2) Vancouver	0	1	1	0	0	1	1	3	1	0	4
113266	b	2	0	2) Vancouver	1	1	0	0	0	0	0	4.1	0	1	0
113266	y1	0	0	2) Vancouver	1	1	0	0	1	0	0	4.1	0	1	1
113266	y2	0	0	2) Vancouver	1	1	0	0	1	0	0	4.1	0	1	2
113266	y3	2	0	2) Vancouver	1	1	1	0	1	0	0	4.1	0	0	3
113266	y4	3	0	2) Vancouver	1	1	1	0	1	0	0	4.1	0	0	4
113267	b	2	0	2) Vancouver	1	1	0	0	0	0	0	4.9	1	1	0
113267	y1	1	0	2) Vancouver	1	1	1	0	0	0	0	4.9	1	0	1
113267	y2	0	0	2) Vancouver	1	1	1	0	0	0	0	4.9	1	0	2
113267	y3	1	0	2) Vancouver	1	1	1	0	0	0	0	4.9	1	0	3
113267	y4	1	0	2) Vancouver	1	1	1	0	0	0	0	4.9	1	0	4
113268	b	1	0	2) Vancouver	1	1	0	0	1	0	0	5	0	1	0
113268	y1	1	0	2) Vancouver	1	1	0	1	1	0	1	5	0	1	1
113268	y2	1	0	2) Vancouver	1	1	0	1	0	1	1	5	0	0	2
113268	y3	1	0	2) Vancouver	1	1	0	1	1	0	1	5	0	0	3
113268	y4	0	0	2) Vancouver	1	1	0	1	1	0	1	5	0	0	4
113269	b	4	0	2) Vancouver	1	0	1	0	1	1	1	4	0	1	0
113269	y1	2	0	2) Vancouver	1	0	1	1	1	0	1	4	0	1	1
113269	y2	1	0	2) Vancouver	1	0	0	0	1	0	0	4	0	1	2
113269	y3	3	0	2) Vancouver	1	0	0	0	1	0	0	4	0	0	3
113272	b	3	0	2) Vancouver	1	0	1	0	0	0	0	4.8	1	1	0
113272	y1	2	0	2) Vancouver	1	0	1	0	0	0	0	4.8	1	0	1
113272	y2	0	0	2) Vancouver	1	0	0	0	0	0	0	4.8	1	0	2
113272	y3	1	0	2) Vancouver	1	0	0	0	0	0	0	4.8	1	0	3
113272	y4	0	0	2) Vancouver	1	0	0	0	0	0	0	4.8	1	0	4
113273	b	2	0	2) Vancouver	1	1	0	0	1	1	1	5.3	0	1	0
113273	y1	1	0	2) Vancouver	1	1	0	1	1	0	1	5.3	0	0	1
113273	y2	1	0	2) Vancouver	1	1	0	1	1	0	1	5.3	0	0	2
113273	y3	1	0	2) Vancouver	1	1	0	0	1	0	0	5.3	0	0	3
113273	y4	1	0	2) Vancouver	1	1	0	0	1	1	1	5.3	0	0	4
113274	b	2	0	2) Vancouver	0	1	0	0	1	1	1	3.1	1	1	0
113274	y2	1	0	2) Vancouver	0	1	1	1	1	1	1	3.1	1	0	2
113274	y3	3	0	2) Vancouver	0	1	1	1	1	0	1	3.1	1	1	3
113274	y4	3	0	2) Vancouver	0	1	1	1	1	1	1	3.1	1	1	4
113276	b	1	0	2) Vancouver	1	1	1	0	1	1	1	3.7	1	1	0
113276	y1	1	0	2) Vancouver	1	1	1	0	1	1	1	3.7	1	0	1
113276	y2	0	0	2) Vancouver	1	1	1	0	1	1	1	3.7	1	0	2
113276	y3	1	0	2) Vancouver	1	1	1	0	1	1	1	3.7	1	0	3
113276	y4	0	0	2) Vancouver	1	1	1	0	0	0	0	3.7	1	0	4
113285	b	1	1	2) Vancouver	1	1	0	0	1	0	0	4.3	0	1	0
113285	y1	1	1	2) Vancouver	1	1	0	0	1	0	0	4.3	0	0	1
113285	y2	1	1	2) Vancouver	1	1	0	0	1	0	0	4.3	0	0	2
113285	y3	1	1	2) Vancouver	1	1	0	0	0	0	0	4.3	0	0	3
113285	y4	0	1	2) Vancouver	1	1	1	0	0	0	0	4.3	0	0	4
113303	b	3	0	2) Vancouver	0	0	1	0	1	0	0	3.1	1	1	0
113324	b	4	1	2) Vancouver	1	0	1	0	1	1	1	4.2	0	1	0
113324	y1	2	1	2) Vancouver	1	0	1	0	1	0	0	4.2	0	0	1
113324	y2	0	1	2) Vancouver	1	0	1	0	1	1	1	4.2	0	0	2
113324	y3	2	1	2) Vancouver	1	0	1	0	0	0	0	4.2	0	0	3
113324	y4	2	1	2) Vancouver	1	0	1	0	1	0	0	4.2	0	0	4
113325	b	3	1	2) Vancouver	1	1	0	0	0	0	0	4.9	1	1	0
113325	y1	2	1	2) Vancouver	1	1	0	0	0	0	0	4.9	1	0	1
113325	y2	1	1	2) Vancouver	1	1	0	0	0	0	0	4.9	1	0	2
113325	y3	1	1	2) Vancouver	1	1	0	0	0	0	0	4.9	1	0	3
113325	y4	1	1	2) Vancouver	1	1	0	0	1	0	0	4.9	1	0	4
113365	b	3	0	2) Vancouver	0	0	1	0	0	0	0	3.4	1	1	0
113365	y1	2	0	2) Vancouver	0	0	1	0	0	0	0	3.4	1	0	1
113365	y2	3	0	2) Vancouver	0	0	1	1	0	1	1	3.4	1	1	2
113365	y3	3	0	2) Vancouver	0	0	1	0	1	1	1	3.4	1	1	3
113365	y4	4	0	2) Vancouver	0	0	1	0	1	0	0	3.4	1	1	4
113366	b	3	0	2) Vancouver	1	1	1	1	1	1	1	2.4	0	1	0
113366	y1	3	0	2) Vancouver	1	1	0	1	0	1	1	2.4	0	0	1
113366	y2	3	0	2) Vancouver	1	1	1	0	1	0	0	2.4	0	1	2
113366	y3	4	0	2) Vancouver	1	1	1	1	1	1	1	2.4	0	1	3
113366	y4	2	0	2) Vancouver	1	1	1	0	0	1	1	2.4	0	1	4
113369	b	3	0	2) Vancouver	0	1	0	0	1	0	0	3.2	1	1	0
113369	y1	2	0	2) Vancouver	0	1	1	1	0	0	1	3.2	1	0	1
113369	y2	5	0	2) Vancouver	0	1	1	1	1	1	1	3.2	1	0	2
113369	y3	2	0	2) Vancouver	0	1	1	0	1	0	0	3.2	1	0	3
113375	b	4	0	2) Vancouver	1	0	1	0	1	0	0	4.5	1	1	0
113375	y1	5	0	2) Vancouver	1	0	0	0	1	0	0	4.5	1	1	1
113375	y2	2	0	2) Vancouver	1	0	0	0	1	0	0	4.5	1	0	2
113375	y3	2	0	2) Vancouver	1	0	1	0	1	0	0	4.5	1	0	3
113375	y4	2	0	2) Vancouver	1	0	1	0	1	0	0	4.5	1	0	4
113377	b	3	0	2) Vancouver	1	1	0	0	1	1	1	4.6	1	1	0
113377	y2	0	0	2) Vancouver	1	1	0	0	0	0	0	4.6	1	0	2
113377	y3	4	0	2) Vancouver	1	1	0	0	1	1	1	4.6	1	0	3
113377	y4	0	0	2) Vancouver	1	1	0	0	1	0	0	4.6	1	0	4
113380	b	3	0	2) Vancouver	1	1	0	1	1	1	1	4.6	0	1	0
113380	y1	3	0	2) Vancouver	1	1	0	0	1	0	0	4.6	0	0	1
113380	y2	1	0	2) Vancouver	1	1	0	0	1	0	0	4.6	0	0	2
113380	y3	1	0	2) Vancouver	1	1	0	0	1	0	0	4.6	0	0	3
113380	y4	0	0	2) Vancouver	1	1	0	0	1	0	0	4.6	0	0	4
113381	b	2	0	2) Vancouver	0	0	0	0	0	0	0	4	0	1	0
113381	y1	1	0	2) Vancouver	0	0	0	0	0	0	0	4	0	0	1
113381	y2	0	0	2) Vancouver	0	0	0	0	0	0	0	4	0	0	2
113381	y3	2	0	2) Vancouver	0	0	0	0	0	0	0	4	0	1	3
113382	b	3	1	2) Vancouver	1	0	1	0	1	0	0	4.7	0	1	0
113382	y1	1	1	2) Vancouver	1	0	0	0	0	0	0	4.7	0	0	1
113382	y2	0	1	2) Vancouver	1	0	1	0	0	0	0	4.7	0	0	2
113382	y3	2	1	2) Vancouver	1	0	1	0	0	0	0	4.7	0	0	3
113382	y4	0	1	2) Vancouver	1	0	0	0	0	0	0	4.7	0	0	4
113383	b	2	0	2) Vancouver	1	0	1	0	1	0	0	3.5	1	1	0
113383	y1	3	0	2) Vancouver	1	0	1	0	1	1	1	3.5	1	0	1
113383	y2	1	0	2) Vancouver	1	0	1	0	0	0	0	3.5	1	0	2
113383	y3	2	0	2) Vancouver	1	0	1	0	0	0	0	3.5	1	0	3
113384	b	4	0	2) Vancouver	0	1	1	0	0	0	0	2.9	1	1	0
113389	b	3	0	2) Vancouver	1	1	1	1	1	1	1	3.7	1	1	0
113389	y1	2	0	2) Vancouver	1	1	1	0	1	1	1	3.7	1	1	1
113389	y2	4	0	2) Vancouver	1	1	1	0	1	0	0	3.7	1	1	2
113389	y3	4	0	2) Vancouver	1	1	1	0	1	0	0	3.7	1	0	3
113389	y4	6	0	2) Vancouver	1	1	1	0	1	1	1	3.7	1	1	4
113392	b	1	0	2) Vancouver	0	0	1	1	1	1	1	4.8	1	1	0
113392	y4	1	0	2) Vancouver	0	0	1	0	1	1	1	4.8	1	0	4
113393	b	4	0	2) Vancouver	1	0	1	1	0	0	1	3.9	0	1	0
113393	y1	4	0	2) Vancouver	1	0	1	1	0	0	1	3.9	0	1	1
113393	y2	2	0	2) Vancouver	1	0	1	1	0	0	1	3.9	0	1	2
113393	y3	2	0	2) Vancouver	1	0	1	1	1	0	1	3.9	0	0	3
113394	b	1	0	2) Vancouver	0	1	0	0	1	0	0	4.3	0	1	0
113394	y1	2	0	2) Vancouver	0	1	1	0	0	0	0	4.3	0	0	1
113394	y2	0	0	2) Vancouver	0	1	0	0	0	0	0	4.3	0	0	2
113394	y3	1	0	2) Vancouver	0	1	0	0	0	0	0	4.3	0	0	3
113394	y4	1	0	2) Vancouver	0	1	0	0	0	0	0	4.3	0	0	4
113395	b	4	0	2) Vancouver	1	0	0	1	1	1	1	3.7	0	1	0
113395	y1	2	0	2) Vancouver	1	0	0	1	1	1	1	3.7	0	1	1
113395	y2	1	0	2) Vancouver	1	0	0	1	1	1	1	3.7	0	1	2
113395	y3	4	0	2) Vancouver	1	0	0	1	1	1	1	3.7	0	0	3
113396	b	3	0	2) Vancouver	1	0	0	1	0	0	1	3.8	1	1	0
113396	y1	1	0	2) Vancouver	1	0	0	0	1	0	0	3.8	1	0	1
113396	y2	0	0	2) Vancouver	1	0	1	0	1	0	0	3.8	1	0	2
113396	y3	2	0	2) Vancouver	1	0	0	1	0	1	1	3.8	1	0	3
113396	y4	3	0	2) Vancouver	1	0	0	1	1	1	1	3.8	1	0	4
113398	b	3	0	2) Vancouver	1	1	0	1	0	1	1	3.5	1	1	0
113398	y1	1	0	2) Vancouver	1	1	1	1	1	1	1	3.5	1	1	1
113398	y2	2	0	2) Vancouver	1	1	0	0	0	1	1	3.5	1	0	2
113398	y3	1	0	2) Vancouver	1	1	0	0	0	0	0	3.5	1	0	3
113398	y4	0	0	2) Vancouver	1	1	0	0	0	0	0	3.5	1	0	4
113400	b	4	0	2) Vancouver	0	0	1	1	0	1	1	3.7	1	1	0
113400	y1	1	0	2) Vancouver	0	0	1	0	0	0	0	3.7	1	0	1
113400	y2	0	0	2) Vancouver	0	0	1	1	0	1	1	3.7	1	0	2
113400	y3	1	0	2) Vancouver	0	0	1	0	0	0	0	3.7	1	0	3
113400	y4	0	0	2) Vancouver	0	0	1	1	0	1	1	3.7	1	0	4
113401	b	1	1	2) Vancouver	1	1	0	0	1	0	0	4.8	1	1	0
113401	y1	3	1	2) Vancouver	1	1	0	0	1	0	0	4.8	1	0	1
113401	y2	0	1	2) Vancouver	1	1	0	0	0	0	0	4.8	1	0	2
113401	y3	1	1	2) Vancouver	1	1	0	0	0	0	0	4.8	1	0	3
113402	b	2	0	2) Vancouver	1	1	1	1	0	1	1	3.9	1	1	0
113402	y1	1	0	2) Vancouver	1	1	0	1	1	1	1	3.9	1	0	1
113402	y2	0	0	2) Vancouver	1	1	1	1	0	1	1	3.9	1	0	2
113402	y3	3	0	2) Vancouver	1	1	1	1	1	1	1	3.9	1	0	3
113402	y4	3	0	2) Vancouver	1	1	1	1	1	1	1	3.9	1	0	4
113410	b	5	0	2) Vancouver	0	0	1	1	0	1	1	2.6	0	1	0
113410	y1	2	0	2) Vancouver	0	0	1	0	0	0	0	2.6	0	0	1
113414	b	4	1	2) Vancouver	0	1	1	0	0	0	0	5.7	1	1	0
113414	y1	1	1	2) Vancouver	0	1	0	0	1	0	0	5.7	1	0	1
113414	y2	1	1	2) Vancouver	0	1	0	0	1	0	0	5.7	1	0	2
113414	y3	1	1	2) Vancouver	0	1	0	0	1	0	0	5.7	1	0	3
114076	b	2	0	2) Vancouver	1	0	1	0	0	0	0	4.6	0	0	0
114076	y1	0	0	2) Vancouver	1	0	1	0	0	0	0	4.6	0	0	1
114076	y2	1	0	2) Vancouver	1	0	1	0	0	0	0	4.6	0	0	2
114076	y3	3	0	2) Vancouver	1	0	1	1	0	0	1	4.6	0	0	3
114076	y4	0	0	2) Vancouver	1	0	1	0	0	0	0	4.6	0	0	4
114077	b	2	0	2) Vancouver	1	1	0	0	0	0	0	5.5	1	0	0
114077	y1	0	0	2) Vancouver	1	1	0	0	0	0	0	5.5	1	0	1
114077	y2	0	0	2) Vancouver	1	1	0	0	0	0	0	5.5	1	0	2
114077	y3	1	0	2) Vancouver	1	1	0	0	0	0	0	5.5	1	0	3
114077	y4	0	0	2) Vancouver	1	1	0	0	0	0	0	5.5	1	0	4
114174	b	2	1	2) Vancouver	1	1	0	0	1	0	0	4	1	0	0
114174	y1	0	1	2) Vancouver	1	1	1	0	1	0	0	4	1	0	1
114174	y2	0	1	2) Vancouver	1	1	0	0	1	0	0	4	1	0	2
114174	y3	1	1	2) Vancouver	1	1	1	0	0	0	0	4	1	0	3
114174	y4	1	1	2) Vancouver	1	1	0	0	1	0	0	4	1	0	4
114183	b	3	0	2) Vancouver	1	0	1	0	0	0	0	5.1	0	0	0
114183	y1	2	0	2) Vancouver	1	0	1	0	0	0	0	5.1	0	0	1
114183	y2	3	0	2) Vancouver	1	0	1	0	0	0	0	5.1	0	1	2
114183	y3	3	0	2) Vancouver	1	0	0	0	0	0	0	5.1	0	0	3
114183	y4	0	0	2) Vancouver	1	0	1	0	0	0	0	5.1	0	0	4
114184	b	3	0	2) Vancouver	1	0	0	0	0	0	0	4.1	1	0	0
114184	y1	2	0	2) Vancouver	1	0	0	1	0	1	1	4.1	1	0	1
114184	y2	2	0	2) Vancouver	1	0	0	1	0	1	1	4.1	1	0	2
114184	y3	1	0	2) Vancouver	1	0	0	1	0	1	1	4.1	1	0	3
114184	y4	1	0	2) Vancouver	1	0	0	1	0	1	1	4.1	1	0	4
114188	b	5	0	2) Vancouver	0	1	1	1	0	1	1	4.7	1	0	0
114188	y1	0	0	2) Vancouver	0	1	1	0	0	0	0	4.7	1	0	1
114188	y2	0	0	2) Vancouver	0	1	0	0	0	0	0	4.7	1	0	2
114188	y3	1	0	2) Vancouver	0	1	0	0	0	0	0	4.7	1	0	3
114189	b	2	0	2) Vancouver	0	0	1	0	0	0	0	4.8	0	0	0
114189	y1	2	0	2) Vancouver	0	0	1	0	0	0	0	4.8	0	0	1
114189	y2	0	0	2) Vancouver	0	0	1	0	0	0	0	4.8	0	0	2
114189	y3	1	0	2) Vancouver	0	0	1	1	0	1	1	4.8	0	0	3
114189	y4	1	0	2) Vancouver	0	0	1	0	1	0	0	4.8	0	0	4
114190	b	2	0	2) Vancouver	0	1	1	0	0	0	0	4.8	1	0	0
114190	y1	2	0	2) Vancouver	0	1	0	0	0	0	0	4.8	1	0	1
114190	y2	1	0	2) Vancouver	0	1	0	0	0	0	0	4.8	1	0	2
114190	y3	1	0	2) Vancouver	0	1	1	0	0	0	0	4.8	1	0	3
114191	b	2	0	2) Vancouver	0	0	0	1	1	1	1	3.4		0	0
114191	y1	4	0	2) Vancouver	0	0	0	0	1	1	1	3.4		0	1
114191	y2	1	0	2) Vancouver	0	0	1	1	1	1	1	3.4		0	2
114191	y3	1	0	2) Vancouver	0	0	1	1	1	1	1	3.4		0	3
114191	y4	1	0	2) Vancouver	0	0	0	1	1	0	1	3.4		1	4
114196	b	3	1	2) Vancouver	1	0	0	0	1	0	0	3.4	1	0	0
114196	y1	2	1	2) Vancouver	1	0	0	0	0	0	0	3.4	1	0	1
114196	y2	2	1	2) Vancouver	1	0	0	0	0	0	0	3.4	1	0	2
114196	y3	1	1	2) Vancouver	1	0	0	0	0	0	0	3.4	1	0	3
114196	y4	1	1	2) Vancouver	1	0	0	0	0	0	0	3.4	1	0	4
114197	b	2	1	2) Vancouver	0	1	0	1	1	1	1	2.8	0	0	0
114197	y1	2	1	2) Vancouver	0	1	0	1	0	1	1	2.8	0	0	1
114197	y2	2	1	2) Vancouver	0	1	0	0	1	0	0	2.8	0	0	2
114197	y3	1	1	2) Vancouver	0	1	0	0	0	0	0	2.8	0	0	3
114197	y4	1	1	2) Vancouver	0	1	0	0	1	0	0	2.8	0	1	4
114198	b	3	1	2) Vancouver	1	1	1	1	1	0	1	5.4		0	0
114198	y1	2	1	2) Vancouver	1	1	0	0	1	0	0	5.4		0	1
114198	y2	2	1	2) Vancouver	1	1	0	0	1	0	0	5.4		0	2
114198	y3	3	1	2) Vancouver	1	1	0	0	0	0	0	5.4		0	3
114198	y4	0	1	2) Vancouver	1	1	0	0	0	0	0	5.4		0	4
114216	b	4	1	2) Vancouver	1	0	0	1	0	1	1	4.7	1	0	0
114216	y1	0	1	2) Vancouver	1	0	1	0	0	0	0	4.7	1	0	1
114216	y2	0	1	2) Vancouver	1	0	1	0	0	0	0	4.7	1	0	2
114216	y3	1	1	2) Vancouver	1	0	0	0	0	0	0	4.7	1	0	3
114216	y4	0	1	2) Vancouver	1	0	0	0	0	0	0	4.7	1	0	4
114217	b	5	1	2) Vancouver	1	1	1	1	0	1	1	4.4	1	0	0
114217	y1	2	1	2) Vancouver	1	1	0	0	0	0	0	4.4	1	0	1
114217	y2	1	1	2) Vancouver	1	1	0	0	0	1	1	4.4	1	0	2
114217	y3	4	1	2) Vancouver	1	1	0	0	1	0	0	4.4	1	0	3
114217	y4	3	1	2) Vancouver	1	1	0	0	0	0	0	4.4	1	0	4
114218	b	4	1	2) Vancouver	1	0	0	1	1	1	1	4.2	0	0	0
114218	y1	2	1	2) Vancouver	1	0	0	1	1	1	1	4.2	0	0	1
114218	y2	0	1	2) Vancouver	1	0	1	0	0	1	1	4.2	0	0	2
114218	y3	2	1	2) Vancouver	1	0	1	0	1	0	0	4.2	0	1	3
114218	y4	2	1	2) Vancouver	1	0	1	0	1	0	0	4.2	0	0	4
114222	b	2	1	2) Vancouver	1	1	0	0	1	0	0	4.8	1	0	0
114222	y1	2	1	2) Vancouver	1	1	0	0	1	0	0	4.8	1	0	1
114222	y2	0	1	2) Vancouver	1	1	1		1			4.8	1	0	2
114222	y3	1	1	2) Vancouver	1	1	1	0	1	0	0	4.8	1	0	3
114265	b	2	0	2) Vancouver	1	0	0	1	1	1	1	4.2	0	0	0
114270	b	4	0	2) Vancouver	1	0	0	0	0	1	1	4.9	1	0	0
114270	y2	3	0	2) Vancouver	1	0	0	0	0	0	0	4.9	1	1	2
114270	y3	3	0	2) Vancouver	1	0	1	1	1	1	1	4.9	1	1	3
114270	y4	2	0	2) Vancouver	1	0	0	0	0	0	0	4.9	1	1	4
114271	b	3	0	2) Vancouver	1	0	1	0	0	1	1	5	0	0	0
114275	b	3	1	2) Vancouver	1	1	1	1	1	1	1	5.6	1	0	0
114275	y1	0	1	2) Vancouver	1	1	0	0	1	0	0	5.6	1	0	1
114275	y2	0	1	2) Vancouver	1	1	0	0	0	0	0	5.6	1	0	2
114275	y3	2	1	2) Vancouver	1	1	0	0	0	0	0	5.6	1	0	3
114275	y4	0	1	2) Vancouver	1	1	0	0	0	0	0	5.6	1	0	4
114277	b	3	1	2) Vancouver	0	0	0	1	1	1	1	5.1	0	0	0
114277	y1	3	1	2) Vancouver	0	0	0	0	0	0	0	5.1	0	0	1
114277	y2	1	1	2) Vancouver	0	0	0	0	0	0	0	5.1	0	0	2
114277	y3	1	1	2) Vancouver	0	0	0	0	0	0	0	5.1	0	0	3
114277	y4	1	1	2) Vancouver	0	0	0	0	0	0	0	5.1	0	0	4
114278	b	4	0	2) Vancouver	1	1	1	0	0	0	0	4.9	1	0	0
114279	b	2	0	2) Vancouver	0	0	1	0	0	0	0	5.8	0	0	0
114279	y1	2	0	2) Vancouver	0	0	1	0	0	0	0	5.8	0	0	1
114279	y2	0	0	2) Vancouver	0	0	0	0	0	0	0	5.8	0	0	2
114279	y3	3	0	2) Vancouver	0	0	1	0	0	0	0	5.8	0	1	3
114300	b	3	0	2) Vancouver	0	0	0	0	1	0	0	4.7	1	0	0
114300	y1	3	0	2) Vancouver	0	0	0	0	1	0	0	4.7	1	0	1
114300	y2	0	0	2) Vancouver	0	0	0	0	0	0	0	4.7	1	0	2
114300	y3	1	0	2) Vancouver	0	0	0	0	0	0	0	4.7	1	0	3
114300	y4	1	0	2) Vancouver	0	0	0	0	0	0	0	4.7	1	0	4
114301	b	3	0	2) Vancouver	1	1	0	0	0	0	0	4.5	0	0	0
114301	y1	0	0	2) Vancouver	1	1	0	0	0	0	0	4.5	0	0	1
114301	y2	0	0	2) Vancouver	1	1	0	0	1	0	0	4.5	0	0	2
114301	y3	1	0	2) Vancouver	1	1	1	0	0	0	0	4.5	0	0	3
114301	y4	2	0	2) Vancouver	1	1	1	0	0	0	0	4.5	0	1	4
114305	b	4	0	2) Vancouver	1	1	1	0	1	0	0	5.7	1	0	0
114305	y1	0	0	2) Vancouver	1	1	1	0	1	0	0	5.7	1	0	1
114305	y2	3	0	2) Vancouver	1	1	1	0	1	0	0	5.7	1	0	2
114305	y3	1	0	2) Vancouver	1	1	1	0	1	0	0	5.7	1	0	3
114305	y4	0	0	2) Vancouver	1	1	0	0	1	0	0	5.7	1	0	4
114307	b	3	0	2) Vancouver	0	0	1	0	0	0	0	4.2	1	0	0
114307	y2	4	0	2) Vancouver	0	0	1	1	1	1	1	4.2	1	1	2
114307	y3	5	0	2) Vancouver	0	0	0	1	1	1	1	4.2	1	0	3
114307	y4	1	0	2) Vancouver	0	0	1	0	1	0	0	4.2	1	1	4
114308	b	3	0	2) Vancouver	0	1	0	0	0	0	0	4.2	0	0	0
114308	y2	2	0	2) Vancouver	0	1	1	0	0	0	0	4.2	0	1	2
114308	y3	2	0	2) Vancouver	0	1	0	0	0	0	0	4.2	0	0	3
114308	y4	0	0	2) Vancouver	0	1	1	0	0	0	0	4.2	0	0	4
114309	b	2	0	2) Vancouver	0	0	0	1	0	1	1	3.3	1	0	0
114309	y1	1	0	2) Vancouver	0	0	0	0	0	0	0	3.3	1	0	1
114309	y2	2	0	2) Vancouver	0	0	0	0	0	1	1	3.3	1	0	2
114309	y3	1	0	2) Vancouver	0	0	0	0	0	0	0	3.3	1	0	3
114309	y4	2	0	2) Vancouver	0	0	0	0	0	0	0	3.3	1	0	4
114315	b	3	1	2) Vancouver	1	1	0	0	1	0	0	5.2	1	0	0
114316	b	3	1	2) Vancouver	1	0	0	0	0	0	0	5	1	0	0
114316	y1	0	1	2) Vancouver	1	0	0	0	0	0	0	5	1	0	1
114316	y2	0	1	2) Vancouver	1	0	0	0	0	0	0	5	1	0	2
114316	y3	1	1	2) Vancouver	1	0	0	0	0	0	0	5	1	0	3
114316	y4	0	1	2) Vancouver	1	0	0	0	0	0	0	5	1	0	4
114317	b	3	1	2) Vancouver	1	0	0	0	1	0	0	4.7	1	0	0
114317	y1	0	1	2) Vancouver	1	0	0	0	1	0	0	4.7	1	0	1
114317	y2	3	1	2) Vancouver	1	0	0	0	0	0	0	4.7	1	0	2
114317	y3	1	1	2) Vancouver	1	0	0	0	0	0	0	4.7	1	0	3
114317	y4	0	1	2) Vancouver	1	0	1	0	1	0	0	4.7	1	0	4
114318	b	1	1	2) Vancouver	0		0	0	1	0	0	2.6	0	0	0
114318	y1	1	1	2) Vancouver	0		0	0	0	0	0	2.6	0	0	1
114318	y2	1	1	2) Vancouver	0		0	0	0	0	0	2.6	0	0	2
114318	y3	1	1	2) Vancouver	0		1	0	0	0	0	2.6	0	0	3
114318	y4	0	1	2) Vancouver	0		1	0	0	0	0	2.6	0	0	4
114327	b	2	1	2) Vancouver	1	1	0	0	0	0	0	5.1	0	0	0
114327	y1	0	1	2) Vancouver	1	1	0	0	0	0	0	5.1	0	0	1
114327	y2	0	1	2) Vancouver	1	1	0	0	1	0	0	5.1	0	0	2
114327	y3	1	1	2) Vancouver	1	1	0	0	1	0	0	5.1	0	0	3
114327	y4	1	1	2) Vancouver	1	1	0	0	0	0	0	5.1	0	0	4
114328	b	5	1	2) Vancouver	1	1	0	0	1	0	0	3.9	0	0	0
114328	y1	2	1	2) Vancouver	1	1	0	0	1	0	0	3.9	0	0	1
114332	b	2	0	2) Vancouver	1	1	1	0	0	0	0	4.1	1	0	0
114332	y1	0	0	2) Vancouver	1	1	0	0	0	0	0	4.1	1	0	1
114332	y2	0	0	2) Vancouver	1	1	0	0	0	0	0	4.1	1	0	2
114332	y3	1	0	2) Vancouver	1	1	0	0	0	0	0	4.1	1	0	3
114332	y4	0	0	2) Vancouver	1	1	0	0	0	0	0	4.1	1	0	4
114333	b	2	0	2) Vancouver	0	1	1	1	1	1	1	3.6	1	0	0
114333	y1	0	0	2) Vancouver	0	1	1	1	1	1	1	3.6	1	0	1
114333	y2	0	0	2) Vancouver	0	1	1	0	1	0	0	3.6	1	0	2
114333	y3	1	0	2) Vancouver	0	1	0	0	1	0	0	3.6	1	0	3
114333	y4	0	0	2) Vancouver	0	1	0	0	1	0	0	3.6	1	0	4
114334	b	2	0	2) Vancouver	0	0	1	0	0	0	0	2.8	1	0	0
114334	y1	1	0	2) Vancouver	0	0	1	1	0	0	1	2.8	1	0	1
114334	y2	3	0	2) Vancouver	0	0	1	0	1	0	0	2.8	1	0	2
114334	y3	2	0	2) Vancouver	0	0	1	0	0	0	0	2.8	1	0	3
114334	y4	1	0	2) Vancouver	0	0	1	0	0	0	0	2.8	1	0	4
114349	b	3	1	2) Vancouver	1	0	0	0	0	0	0	5.7	0	0	0
114349	y1	0	1	2) Vancouver	1	0	0	0	0	0	0	5.7	0	0	1
114349	y2	0	1	2) Vancouver	1	0	0	0	0	0	0	5.7	0	0	2
114349	y3	1	1	2) Vancouver	1	0	0	0	0	0	0	5.7	0	0	3
114349	y4	0	1	2) Vancouver	1	0	0	0	0	0	0	5.7	0	0	4
114352	b	4	0	2) Vancouver	0	1	0	1	1	1	1	2.6		0	0
114352	y1	2	0	2) Vancouver	0	1	1	1	0	1	1	2.6		0	1
114352	y2	2	0	2) Vancouver	0	1	1	1	1	1	1	2.6		0	2
114352	y3	2	0	2) Vancouver	0	1	1	1	1	1	1	2.6		0	3
114352	y4	0	0	2) Vancouver	0	1	1	1	1	1	1	2.6		0	4
114353	b	3	0	2) Vancouver	0		0		0			4.2	1	0	0
114354	b	2	0	2) Vancouver	1	0	1	1	1	1	1	4.2	1	0	0
114354	y1	0	0	2) Vancouver	1	0	1	0	1	1	1	4.2	1	0	1
114367	b	2	0	2) Vancouver	1	1	1	0	1	0	0	3.6	1	1	0
114367	y2	2	0	2) Vancouver	1	1	1	1	1	1	1	3.6	1	0	2
114367	y3	3	0	2) Vancouver	1	1	1	1	1	0	1	3.6	1	0	3
114367	y4	2	0	2) Vancouver	1	1	1	0	1	0	0	3.6	1	0	4
114368	b	4	0	2) Vancouver	1	1	0	1	0	1	1	5.3	1	1	0
114368	y1	2	0	2) Vancouver	1	1	1	0	0	0	0	5.3	1	0	1
114368	y2	1	0	2) Vancouver	1	1	1	0	0	0	0	5.3	1	0	2
114368	y3	1	0	2) Vancouver	1	1	1	0	0	0	0	5.3	1	0	3
114368	y4	0	0	2) Vancouver	1	1	1	0	0	0	0	5.3	1	0	4
114370	b	3	0	2) Vancouver	1	1	1	0	0	0	0	3.9	1	0	0
114370	y1	0	0	2) Vancouver	1	1	0	0	0	0	0	3.9	1	0	1
114370	y2	0	0	2) Vancouver	1	1	1	0	0	0	0	3.9	1	0	2
114370	y3	1	0	2) Vancouver	1	1	0	0	0	0	0	3.9	1	0	3
114370	y4	0	0	2) Vancouver	1	1	0	0	0	0	0	3.9	1	0	4
114371	b	4	1	2) Vancouver	0	1	0	1	1	1	1	3.8	1	0	0
114371	y1	3	1	2) Vancouver	0	1	0	0	0	0	0	3.8	1	0	1
114371	y2	3	1	2) Vancouver	0	1	0	1	0	1	1	3.8	1	0	2
114371	y3	1	1	2) Vancouver	0	1	0	0	0	0	0	3.8	1	0	3
114371	y4	1	1	2) Vancouver	0	1	0	0	0	0	0	3.8	1	0	4
114372	b	7	0	2) Vancouver	0	1	1	0	0	0	0	4.4	0	0	0
114373	b	3	0	2) Vancouver	0	0	1	0	0	0	0	4.9	1	0	0
114373	y1	0	0	2) Vancouver	0	0	1	1	0	1	1	4.9	1	0	1
114373	y2	0	0	2) Vancouver	0	0	1	0	0	0	0	4.9	1	0	2
114373	y3	1	0	2) Vancouver	0	0	0	0	1	0	0	4.9	1	0	3
114373	y4	0	0	2) Vancouver	0	0	1	0	0	0	0	4.9	1	0	4
114374	b	3	0	2) Vancouver	1	1	0	1	1	1	1	5.2	1	1	0
114374	y1	1	0	2) Vancouver	1	1	0	0	1	0	0	5.2	1	0	1
114374	y2	2	0	2) Vancouver	1	1	0	1	0	1	1	5.2	1	1	2
114374	y3	3	0	2) Vancouver	1	1	0	0	1	0	0	5.2	1	1	3
114374	y4	2	0	2) Vancouver	1	1	0	0	0	0	0	5.2	1	0	4
114376	b	4	0	2) Vancouver	0	1	1	0	0	0	0	6.9	1	0	0
114376	y1	2	0	2) Vancouver	0	1	1	0	0	0	0	6.9	1	1	1
114376	y2	3	0	2) Vancouver	0	1	1	0	0	0	0	6.9	1	1	2
114376	y3	4	0	2) Vancouver	0	1	1	0	0	0	0	6.9	1	0	3
114376	y4	2	0	2) Vancouver	0	1	0	1	0	1	1	6.9	1	0	4
114378	b	3	0	2) Vancouver	0	0	0	0	1	0	0	3.7	1	0	0
114378	y1	2	0	2) Vancouver	0	0	1	0	0	0	0	3.7	1	0	1
114378	y2	1	0	2) Vancouver	0	0	0	0	1	0	0	3.7	1	0	2
114378	y3	1	0	2) Vancouver	0	0	1	1	0	1	1	3.7	1	0	3
114379	b	2	0	2) Vancouver	0	0	0	0	1	0	0	4.5	1	1	0
114379	y2	1	0	2) Vancouver	0	0	1	0	0	0	0	4.5	1	0	2
114390	b	2	0	2) Vancouver	0	0	0	0	1	0	0	4.5	1	1	0
114390	y1	3	0	2) Vancouver	0	0	0	0	0	0	0	4.5	1	0	1
114390	y2	2	0	2) Vancouver	0	0	1	0	1	0	0	4.5	1	0	2
114390	y3	2	0	2) Vancouver	0	0	1	0	0	0	0	4.5	1	0	3
114390	y4	0	0	2) Vancouver	0	0	1	0	0	0	0	4.5	1	0	4
114391	b	3	0	2) Vancouver	0	0	0	1	0	1	1	3.2	1	1	0
114399	b	4	0	2) Vancouver	0	1	1	0	0	0	0	4.5	0	0	0
114399	y2	5	0	2) Vancouver	0	1	1	0	1	0	0	4.5	0	0	2
114399	y3	1	0	2) Vancouver	0	1	1	0	0	0	0	4.5	0	0	3
114399	y4	0	0	2) Vancouver	0	1	1	0	1	0	0	4.5	0	0	4
114407	b	3	1	2) Vancouver	1	0	0	0	1	0	0	5.7	0	0	0
114407	y1	0	1	2) Vancouver	1	0	0	0	0	0	0	5.7	0	0	1
114407	y2	0	1	2) Vancouver	1	0	0	0	0	0	0	5.7	0	0	2
114407	y3	1	1	2) Vancouver	1	0	0	0	0	0	0	5.7	0	0	3
114407	y4	0	1	2) Vancouver	1	0	0	0	0	0	0	5.7	0	0	4
114413	b	6	1	2) Vancouver	1	0	0	0	1	0	0	4.4	0	0	0
114413	y1	1	1	2) Vancouver	1	0	0	0	0	0	0	4.4	0	0	1
114413	y2	0	1	2) Vancouver	1	0	0	0	1	0	0	4.4	0	0	2
114413	y3	1	1	2) Vancouver	1	0	0	0	0	0	0	4.4	0	0	3
114413	y4	1	1	2) Vancouver	1	0	0	0	0	0	0	4.4	0	0	4
121001	b	3	1	3)Toronto	1	0	0	0	1	0	0	3.3	0	0	0
121001	y1	0	1	3)Toronto	1	0	0	0	1	0	0	3.3	0	0	1
121001	y2	0	1	3)Toronto	1	0	0	0	1	0	0	3.3	0	0	2
121002	b	3	1	3)Toronto	0	1	0	1	1	1	1	3.1	1	0	0
121002	y1	1	1	3)Toronto	0	1	0	1	0	1	1	3.1	1	0	1
121002	y2	1	1	3)Toronto	0	1	0	0	1	0	0	3.1	1	0	2
121002	y3	2	1	3)Toronto	0	1	0	0	1	0	0	3.1	1	0	3
121002	y4	4	1	3)Toronto	0	1	0	0	1	0	0	3.1	1	1	4
121003	b	4	0	3)Toronto	0	0	0	0	0	0	0	5.2		0	0
121003	y1	0	0	3)Toronto	0	0	0	0	0	0	0	5.2		0	1
121003	y2	2	0	3)Toronto	0	0	0	0	0	0	0	5.2		0	2
121003	y3	1	0	3)Toronto	0	0	0	0	0	0	0	5.2		0	3
121003	y4	1	0	3)Toronto	0	0	0	0	0	1	1	5.2		0	4
121004	b	2	1	3)Toronto	0	1	0	0	0	0	0	4.3		0	0
121004	y1	0	1	3)Toronto	0	1	0	0	0	0	0	4.3		0	1
121004	y2	0	1	3)Toronto	0	1	0	0	0	1	1	4.3		0	2
121004	y3	4	1	3)Toronto	0	1	0	0	0	0	0	4.3		1	3
121004	y4	2	1	3)Toronto	0	1	0	0	0	0	0	4.3		0	4
121005	b	3	1	3)Toronto	1	1	0	1	0	1	1	5.1	0	0	0
121005	y1	0	1	3)Toronto	1	1	1	0	1	0	0	5.1	0	0	1
121005	y2	2	1	3)Toronto	1	1	0	1	0	1	1	5.1	0	0	2
121005	y3	3	1	3)Toronto	1	1	1	1	1	1	1	5.1	0	0	3
121005	y4	1	1	3)Toronto	1	1	1	0	1	0	0	5.1	0	0	4
121006	b	2	0	3)Toronto	0	0	0	0	0	0	0	5	1	0	0
121006	y1	0	0	3)Toronto	0	0	0	1	1	1	1	5	1	0	1
121006	y2	0	0	3)Toronto	0	0	0	0	0	0	0	5	1	0	2
121006	y3	1	0	3)Toronto	0	0	0	0	0	1	1	5	1	0	3
121006	y4	2	0	3)Toronto	0	0	1	1	0	1	1	5	1	0	4
121007	b	2	1	3)Toronto	1	1	0	0	1	1	1	3.3	1	0	0
121007	y1	0	1	3)Toronto	1	1	0	0	0	1	1	3.3	1	0	1
121007	y2	0	1	3)Toronto	1	1	0	0	1	0	0	3.3	1	0	2
121007	y3	1	1	3)Toronto	1	1	0	0	1	0	0	3.3	1	0	3
121008	b	2	1	3)Toronto	1	1	0	0	0	0	0	4.3	0	0	0
121008	y1	0	1	3)Toronto	1	1	0	0	0	0	0	4.3	0	0	1
121008	y2	0	1	3)Toronto	1	1	0	0	0	0	0	4.3	0	0	2
121008	y3	1	1	3)Toronto	1	1	0	1	1	1	1	4.3	0	0	3
121008	y4	2	1	3)Toronto	1	1	0	0	1	0	0	4.3	0	0	4
121009	b	3	0	3)Toronto	1	0	0	1	0	1	1	3.9	0	0	0
121009	y1	0	0	3)Toronto	1	0	0	1	0	1	1	3.9	0	0	1
121009	y2	2	0	3)Toronto	1	0	0	1	0	1	1	3.9	0	0	2
121009	y3	2	0	3)Toronto	1	0	0	1	0	1	1	3.9	0	0	3
121009	y4	1	0	3)Toronto	1	0	0	0	0	0	0	3.9	0	0	4
121010	b	3	1	3)Toronto	1	1	0	0	1	0	0	4.9	1	0	0
121010	y1	2	1	3)Toronto	1	1	0	0	1	0	0	4.9	1	0	1
121010	y2	0	1	3)Toronto	1	1	0	0	0	0	0	4.9	1	0	2
121010	y3	1	1	3)Toronto	1	1	0	0	0	0	0	4.9	1	0	3
121010	y4	1	1	3)Toronto	1	1	0	0	0	0	0	4.9	1	0	4
121011	b	4	0	3)Toronto	1	1	0	1	0	1	1	4.1	1	0	0
121011	y1	0	0	3)Toronto	1	1	0	1	0	1	1	4.1	1	0	1
121011	y2	1	0	3)Toronto	1	1	0	0	0	0	0	4.1	1	0	2
121011	y3	2	0	3)Toronto	1	1	0	1	0	1	1	4.1	1	0	3
121011	y4	3	0	3)Toronto	1	1	0	1	0	1	1	4.1	1	1	4
121012	b	3	0	3)Toronto	1	0	1	0	0	0	0	5.9	1	0	0
121012	y1	1	0	3)Toronto	1	0	1	0	0	0	0	5.9	1	0	1
121012	y2	1	0	3)Toronto	1	0	1	0	0	0	0	5.9	1	0	2
121012	y3	1	0	3)Toronto	1	0	1	0	0	0	0	5.9	1	0	3
121012	y4	1	0	3)Toronto	1	0	1	0	0	0	0	5.9	1	0	4
121013	b	4	1	3)Toronto	1	0	0	0	1	0	0	4.4	1	0	0
121013	y1	0	1	3)Toronto	1	0	0	0	0	0	0	4.4	1	0	1
121013	y2	0	1	3)Toronto	1	0	0	0	0	0	0	4.4	1	0	2
121013	y3	2	1	3)Toronto	1	0	0	0	0	0	0	4.4	1	0	3
121013	y4	1	1	3)Toronto	1	0	0	0	0	0	0	4.4	1	0	4
121014	b	3	1	3)Toronto	0	0	1	0	0	0	0	4.6	1	0	0
121014	y1	0	1	3)Toronto	0	0	1	0	0	0	0	4.6	1	0	1
121014	y2	0	1	3)Toronto	0	0	0	0	0	0	0	4.6	1	0	2
121014	y3	1	1	3)Toronto	0	0	0	0	0	0	0	4.6	1	0	3
121014	y4	1	1	3)Toronto	0	0	1	0	0	0	0	4.6	1	0	4
121015	b	4	1	3)Toronto	0	1	0	0	0	0	0	6		0	0
121015	y1	0	1	3)Toronto	0	1	1	0	0	0	0	6		0	1
121015	y2	0	1	3)Toronto	0	1	0	0	0	0	0	6		0	2
121015	y3	1	1	3)Toronto	0	1	1	0	0	0	0	6		0	3
121015	y4	1	1	3)Toronto	0	1	0	0	0	0	0	6		0	4
121016	b	3	0	3)Toronto	1	0	1	0	1	1	1	5.6	1	0	0
121016	y1	0	0	3)Toronto	1	0	1	0	1	0	0	5.6	1	0	1
121016	y2	0	0	3)Toronto	1	0	1	0	1	0	0	5.6	1	0	2
121016	y3	1	0	3)Toronto	1	0	1	0	0	0	0	5.6	1	0	3
121016	y4	1	0	3)Toronto	1	0	1	0	0	0	0	5.6	1	0	4
121017	b	3	1	3)Toronto	1	0	0	0	1	0	0	3.4	1	0	0
121017	y1	0	1	3)Toronto	1	0	0	0	1	0	0	3.4	1	0	1
121017	y2	0	1	3)Toronto	1	0	0	0	1	0	0	3.4	1	0	2
121017	y3	2	1	3)Toronto	1	0	0	0	1	0	0	3.4	1	0	3
121017	y4	1	1	3)Toronto	1	0	0	0	0	0	0	3.4	1	0	4
121019	b	2	1	3)Toronto	1	1	1	0	0	0	0	4.9	1	0	0
121019	y1	1	1	3)Toronto	1	1	1	0	0	0	0	4.9	1	0	1
121019	y2	1	1	3)Toronto	1	1	0	0	0	0	0	4.9	1	0	2
121019	y3	1	1	3)Toronto	1	1	1	0	0	0	0	4.9	1	0	3
121019	y4	1	1	3)Toronto	1	1	1	0	0	0	0	4.9	1	0	4
121020	b	3	0	3)Toronto	0	1	0	0	0	0	0	4.6	1	0	0
121020	y1	0	0	3)Toronto	0	1	0	0	0	0	0	4.6	1	0	1
121021	b	3	0	3)Toronto	0	0	1	0	1	1	1	3.4	1	0	0
121021	y2	1	0	3)Toronto	0	0	1	0	0	0	0	3.4	1	0	2
121021	y3	5	0	3)Toronto	0	0	0	0	1	0	0	3.4	1	0	3
121021	y4	3	0	3)Toronto	0	0	0	0	0	0	0	3.4	1	0	4
121022	b	3	0	3)Toronto	0	1	0	0	0	0	0	2.8	1	0	0
121022	y1	2	0	3)Toronto	0	1	0	0	0	0	0	2.8	1	0	1
121022	y2	1	0	3)Toronto	0	1	1	0	0	0	0	2.8	1	0	2
121022	y3	1	0	3)Toronto	0	1	1	0	0	0	0	2.8	1	0	3
121022	y4	1	0	3)Toronto	0	1	1	0	0	0	0	2.8	1	0	4
121023	b	2	0	3)Toronto	1	0	1	0	0	0	0	3.5	1	0	0
121023	y1	0	0	3)Toronto	1	0	0	0	0	0	0	3.5	1	0	1
121023	y2	1	0	3)Toronto	1	0	1	0	0	1	1	3.5	1	1	2
121023	y3	2	0	3)Toronto	1	0	0	0	0	0	0	3.5	1	1	3
121023	y4	2	0	3)Toronto	1	0	1	0	0	1	1	3.5	1	0	4
121024	b	2	0	3)Toronto	0	0	1	0	0	0	0	5.2	1	0	0
121024	y1	1	0	3)Toronto	0	0	0	0	0	0	0	5.2	1	0	1
121024	y2	1	0	3)Toronto	0	0	0	0	0	1	1	5.2	1	0	2
121024	y3	1	0	3)Toronto	0	0	0	0	0	0	0	5.2	1	0	3
121024	y4	1	0	3)Toronto	0	0	0	0	0	0	0	5.2	1	0	4
121025	b	1	0	3)Toronto	1	0	0	0	1	1	1	5.4	0	0	0
121025	y1	0	0	3)Toronto	1	0	0	0	1	0	0	5.4	0	0	1
121025	y2	0	0	3)Toronto	1	0	0	0	1	0	0	5.4	0	0	2
121025	y3	3	0	3)Toronto	1	0	0	0	1	1	1	5.4	0	0	3
121025	y4	4	0	3)Toronto	1	0	0	0	1	0	0	5.4	0	0	4
121026	b	3	0	3)Toronto	1	1	1	0	0	0	0	4.7	1	0	0
121026	y1	0	0	3)Toronto	1	1	0	0	0	0	0	4.7	1	0	1
121026	y2	0	0	3)Toronto	1	1	0	0	0	0	0	4.7	1	0	2
121026	y3	1	0	3)Toronto	1	1	1	0	0	0	0	4.7	1	0	3
121027	b	3	0	3)Toronto	0	1	0	0	1	0	0	4.6	1	0	0
121027	y3	2	0	3)Toronto	0	1	0	0	1	0	0	4.6	1	0	3
121027	y4	2	0	3)Toronto	0	1	0	0	0	0	0	4.6	1	0	4
122001	b	4	1	3)Toronto	0	0	1	0	0	0	0	3.2	0	1	0
122001	y1	3	1	3)Toronto	0	0	0	0	0	0	0	3.2	0	0	1
122001	y2	2	1	3)Toronto	0	0	1	0	0	0	0	3.2	0	0	2
122001	y3	1	1	3)Toronto	0	0	1	0	0	0	0	3.2	0	0	3
122001	y4	2	1	3)Toronto	0	0	1	0	0	0	0	3.2	0	0	4
122002	b	1	1	3)Toronto	1	1	0	0	0	0	0	4.6	1	1	0
122002	y1	1	1	3)Toronto	1	1	0	0	0	0	0	4.6	1	1	1
122002	y2	2	1	3)Toronto	1	1	0	0	0	0	0	4.6	1	0	2
122002	y3	1	1	3)Toronto	1	1	0	0	0	0	0	4.6	1	0	3
122002	y4	1	1	3)Toronto	1	1	0	1	0	1	1	4.6	1	0	4
122003	b	2	1	3)Toronto	0	1	1	0	0	0	0	4.4	0	1	0
122003	y1	2	1	3)Toronto	0	1	0	0	0	0	0	4.4	0	0	1
122003	y2	0	1	3)Toronto	0	1	1	0	0	0	0	4.4	0	0	2
122003	y3	1	1	3)Toronto	0	1	1	0	0	0	0	4.4	0	0	3
122003	y4	1	1	3)Toronto	0	1	1	0	0	0	0	4.4	0	0	4
122004	b	3	1	3)Toronto	0	1	0	1	0	1	1	3.1	0	1	0
122004	y1	2	1	3)Toronto	0	1	0	1	1	1	1	3.1	0	1	1
122004	y2	1	1	3)Toronto	0	1	0	0	0	0	0	3.1	0	1	2
122004	y3	2	1	3)Toronto	0	1	0	0	0	1	1	3.1	0	0	3
122004	y4	1	1	3)Toronto	0	1	0		0			3.1	0	0	4
122005	b	3	1	3)Toronto	1	1	0	0	0	1	1	3.9	1	1	0
122005	y1	1	1	3)Toronto	1	1	1	0	0	0	0	3.9	1	0	1
122005	y2	0	1	3)Toronto	1	1	1	0	0	0	0	3.9	1	0	2
122005	y3	1	1	3)Toronto	1	1	0	0	0	0	0	3.9	1	0	3
122005	y4	1	1	3)Toronto	1	1	1	0	0	0	0	3.9	1	0	4
122006	b	3	1	3)Toronto	0	0	1	0	0	0	0	3.1	0	1	0
122006	y1	2	1	3)Toronto	0	0	0	0	0	0	0	3.1	0	0	1
122006	y2	1	1	3)Toronto	0	0	0	0	0	0	0	3.1	0	0	2
122006	y3	1	1	3)Toronto	0	0	0	1	0	1	1	3.1	0	0	3
122006	y4	1	1	3)Toronto	0	0	1	0	0	0	0	3.1	0	0	4
122007	b	3	1	3)Toronto	1	1	0	1	0	1	1	3.8	1	1	0
122008	b	2	1	3)Toronto	0	1	0	1	0	1	1	5.2	1	1	0
122008	y1	2	1	3)Toronto	0	1	0	0	0	0	0	5.2	1	1	1
122008	y4	0	1	3)Toronto	0	1	0	0	0	0	0	5.2	1	1	4
122009	b	3	1	3)Toronto	0	1	0	0	0	0	0	5.1	0	1	0
122009	y1	1	1	3)Toronto	0	1	0	0	0	0	0	5.1	0	0	1
122009	y2	3	1	3)Toronto	0	1	0	0	0	0	0	5.1	0	1	2
122009	y3	2	1	3)Toronto	0	1	0	0	0	0	0	5.1	0	0	3
122009	y4	3	1	3)Toronto	0	1	1	0	0	0	0	5.1	0	1	4
122010	b	2	1	3)Toronto	1	1	1	0	0	0	0	5.4	0	1	0
122010	y2	0	1	3)Toronto	1	1	1	0	0	0	0	5.4	0	0	2
122010	y3	1	1	3)Toronto	1	1	1	0	0	0	0	5.4	0	0	3
122010	y4	1	1	3)Toronto	1	1	0	0	0	0	0	5.4	0	0	4
122011	b	3	1	3)Toronto	0	1	0	0	0	0	0	4.8	1	1	0
122011	y1	1	1	3)Toronto	0	1	0	0	0	0	0	4.8	1	0	1
122011	y2	0	1	3)Toronto	0	1	0	0	0	0	0	4.8	1	0	2
122011	y3	1	1	3)Toronto	0	1	0	0	0	0	0	4.8	1	0	3
122011	y4	1	1	3)Toronto	0	1	0	0	0	0	0	4.8	1	0	4
122012	b	4	1	3)Toronto	0	0	1	0	0	0	0	6	0	1	0
122012	y1	2	1	3)Toronto	0	0	1	0	0	0	0	6	0	0	1
122012	y2	0	1	3)Toronto	0	0	1	0	0	0	0	6	0	0	2
122012	y3	2	1	3)Toronto	0	0	1	0	0	0	0	6	0	0	3
122012	y4	1	1	3)Toronto	0	0	1	0	0	0	0	6	0	0	4
122013	b	2	0	3)Toronto	1	0	1	0	0	0	0	4.3	1	1	0
122013	y1	2	0	3)Toronto	1	0	1	0	0	0	0	4.3	1	1	1
122013	y2	1	0	3)Toronto	1	0	0	0	0	0	0	4.3	1	0	2
122013	y3	1	0	3)Toronto	1	0	0	0	0	0	0	4.3	1	0	3
122013	y4	2	0	3)Toronto	1	0	0	0	0	0	0	4.3	1	0	4
122014	b	3	0	3)Toronto	0	1	1	0	0	0	0	4.8	1	1	0
122014	y1	1	0	3)Toronto	0	1	1	0	0	0	0	4.8	1	0	1
122014	y2	0	0	3)Toronto	0	1	0	0	1	0	0	4.8	1	0	2
122014	y3	1	0	3)Toronto	0	1	0	0	0	0	0	4.8	1	0	3
122014	y4	1	0	3)Toronto	0	1	0	0	0	0	0	4.8	1	0	4
122015	b	4	0	3)Toronto	0	0	0	0	0	0	0	6.6	1	1	0
122015	y1	1	0	3)Toronto	0	0	0	0	0	0	0	6.6	1	1	1
122015	y2	1	0	3)Toronto	0	0	0	0	0	0	0	6.6	1	1	2
122016	b	2	0	3)Toronto	1	0	0	1	0	1	1	4.1	1	1	0
122016	y1	3	0	3)Toronto	1	0	0	1	0	1	1	4.1	1	1	1
122016	y2	1	0	3)Toronto	1	0	0	0	0	0	0	4.1	1	0	2
122016	y3	5	0	3)Toronto	1	0	0	1	0	1	1	4.1	1	0	3
122016	y4	1	0	3)Toronto	1	0	0	1	0	1	1	4.1	1	0	4
122017	b	3	0	3)Toronto	0	1	1	0	0	0	0	5	0	1	0
122017	y1	2	0	3)Toronto	0	1	1	0	1	0	0	5	0	0	1
122017	y2	0	0	3)Toronto	0	1	0	0	0	0	0	5	0	0	2
122017	y3	1	0	3)Toronto	0	1	0	0	0	0	0	5	0	0	3
122017	y4	1	0	3)Toronto	0	1	0	0	1	0	0	5	0	0	4
122018	b	4	0	3)Toronto	1	1	0	0	0	0	0	4.5	1	1	0
122018	y1	1	0	3)Toronto	1	1	0	0	0	0	0	4.5	1	0	1
122018	y2	0	0	3)Toronto	1	1	0	0	0	0	0	4.5	1	0	2
122018	y3	3	0	3)Toronto	1	1	0	0	0	0	0	4.5	1	1	3
122018	y4	1	0	3)Toronto	1	1	0	0	0	0	0	4.5	1	1	4
122019	b	2	0	3)Toronto	1	0	1	0	0	0	0	5.9	1	1	0
122019	y1	2	0	3)Toronto	1	0	1	0	0	0	0	5.9	1	1	1
122019	y2	1	0	3)Toronto	1	0	0	0	0	0	0	5.9	1	0	2
122019	y3	1	0	3)Toronto	1	0	1	0	0	0	0	5.9	1	0	3
122019	y4	1	0	3)Toronto	1	0	0	0	0	0	0	5.9	1	0	4
122020	b	3	0	3)Toronto	0	0	0	0	0	0	0	4.7	1	1	0
122020	y1	5	0	3)Toronto	0	0	1	0	0	0	0	4.7	1	0	1
122020	y2	2	0	3)Toronto	0	0	0	0	0	0	0	4.7	1	0	2
122020	y3	2	0	3)Toronto	0	0	0	0	0	0	0	4.7	1	0	3
122020	y4	1	0	3)Toronto	0	0	0	0	0	0	0	4.7	1	0	4
122021	b	3	0	3)Toronto	1	0	0	0	0	1	1	5.1	1	1	0
122021	y1	1	0	3)Toronto	1	0	0	0	0	0	0	5.1	1	0	1
122021	y2	0	0	3)Toronto	1	0	0	0	0	0	0	5.1	1	0	2
122021	y3	1	0	3)Toronto	1	0	0	0	0	0	0	5.1	1	0	3
122022	b	2	0	3)Toronto	0	0	1	0	1	0	0	3.1	1	1	0
122022	y1	1	0	3)Toronto	0	0	1	0	1	0	0	3.1	1	0	1
122022	y2	0	0	3)Toronto	0	0	1	0	0	0	0	3.1	1	0	2
122022	y3	1	0	3)Toronto	0	0	1	0	0	0	0	3.1	1	0	3
122022	y4	1	0	3)Toronto	0	0	0	0	0	0	0	3.1	1	0	4
122023	b	1	0	3)Toronto	1	0	1	0	0	0	0	6.4	1	1	0
122023	y1	1	0	3)Toronto	1	0	0	0	0	0	0	6.4	1	0	1
122024	b	1	0	3)Toronto	0	1	1	0	0	0	0	3.9	0	1	0
122024	y1	1	0	3)Toronto	0	1	0	0	0	0	0	3.9	0	0	1
122024	y2	0	0	3)Toronto	0	1	0	0	0	1	1	3.9	0	0	2
122024	y3	1	0	3)Toronto	0	1	1	0	0	0	0	3.9	0	0	3
122024	y4	1	0	3)Toronto	0	1	1	0	0	0	0	3.9	0	0	4
122025	b	2	0	3)Toronto	0	0	0	0	0	0	0	4.6	1	1	0
122025	y1	1	0	3)Toronto	0	0	0	0	0	0	0	4.6	1	1	1
122025	y2	0	0	3)Toronto	0	0	1	0	0	1	1	4.6	1	1	2
122025	y3	1	0	3)Toronto	0	0	0	0	1	0	0	4.6	1	1	3
122025	y4	1	0	3)Toronto	0	0	0	0	0	0	0	4.6	1	1	4
122026	b	3	0	3)Toronto	1	0	0	0	0	0	0	3.7	1	1	0
122026	y1	1	0	3)Toronto	1	0	0	0	0	1	1	3.7	1	0	1
122026	y2	0	0	3)Toronto	1	0	0	0	0	0	0	3.7	1	0	2
122026	y3	3	0	3)Toronto	1	0	0	0	0	0	0	3.7	1	0	3
122026	y4	1	0	3)Toronto	1	0	0	0	0	0	0	3.7	1	0	4
122027	b	4	0	3)Toronto	0	1	0	1	0	1	1	4	1	1	0
122027	y1	1	0	3)Toronto	0	1	1	1	0	1	1	4	1	1	1
122027	y2	2	0	3)Toronto	0	1	1	1	0	1	1	4	1	1	2
122027	y3	1	0	3)Toronto	0	1	0	1	0	1	1	4	1	0	3
122028	b	3	0	3)Toronto	0	1	0	1	1	1	1	2.7	0	1	0
122028	y1	2	0	3)Toronto	0	1	1	0	1	1	1	2.7	0	1	1
122028	y3	2	0	3)Toronto	0	1	0	1	1	1	1	2.7	0	1	3
122028	y4	1	0	3)Toronto	0	1	0	1	1	1	1	2.7	0	1	4
122029	b	1	0	3)Toronto	0	0	0	0	0	0	0	4	0	1	0
122029	y1	1	0	3)Toronto	0	0			0			4	0	1	1
122029	y2	1	0	3)Toronto	0	0	0	0	0	0	0	4	0	1	2
122029	y3	2	0	3)Toronto	0	0	0	0	1	0	0	4	0	1	3
122029	y4	1	0	3)Toronto	0	0	0	0	0	0	0	4	0	1	4
122030	b	3	0	3)Toronto	1	0	0	0	0	0	0	5.1	1	1	0
122030	y1	1	0	3)Toronto	1	0	0	0	0	0	0	5.1	1	1	1
122030	y2	1	0	3)Toronto	1	0	0	0	0	0	0	5.1	1	1	2
122030	y3	1	0	3)Toronto	1	0	0	0	0	0	0	5.1	1	1	3
122030	y4	2	0	3)Toronto	1	0	0	0	0	0	0	5.1	1	1	4
122031	b	2	0	3)Toronto	0	0	0	0	0	0	0	4	0	1	0
122032	b	2	0	3)Toronto	0	0	0	0	1	1	1	3.7	1	1	0
122032	y1	0	0	3)Toronto	0	0	0	0	1	0	0	3.7	1	1	1
122032	y2	2	0	3)Toronto	0	0	1	1	1	1	1	3.7	1	1	2
122032	y3	1	0	3)Toronto	0	0	1	0	1	0	0	3.7	1	1	3
122032	y4	1	0	3)Toronto	0	0	1	0	1	0	0	3.7	1	1	4
122034	b	4	0	3)Toronto	0	0	1	0	0	0	0	3.4	0	1	0
122035	b	2	0	3)Toronto	0	0	1	0	0	0	0	4.9	1	1	0
122035	y1	1	0	3)Toronto	0	0	1	0	0	0	0	4.9	1	0	1
122035	y2	0	0	3)Toronto	0	0	0	0	0	0	0	4.9	1	0	2
122035	y3	1	0	3)Toronto	0	0	0	0	0	0	0	4.9	1	0	3
122035	y4	1	0	3)Toronto	0	0	0	0	0	0	0	4.9	1	0	4
122036	b	3	0	3)Toronto	0	0	0	1	0	1	1	3.2	0	1	0
122036	y1	2	0	3)Toronto	0	0	0	1	0	1	1	3.2	0	1	1
122036	y2	1	0	3)Toronto	0	0	0	1	0	1	1	3.2	0	1	2
122036	y4	1	0	3)Toronto	0	0	0	1	0	1	1	3.2	0	1	4
122037	b	2	0	3)Toronto	0	0	0	1	1	1	1	4.7	1	1	0
122037	y1	0	0	3)Toronto	0	0	0	1	0	1	1	4.7	1	1	1
122037	y2	1	0	3)Toronto	0	0	0	1	1	1	1	4.7	1	0	2
122037	y3	1	0	3)Toronto	0	0	0	0	1	0	0	4.7	1	0	3
122037	y4	1	0	3)Toronto	0	0	0	0	1	0	0	4.7	1	0	4
122038	b	2	0	3)Toronto	0	0	1	0	1	1	1	4.1	0	1	0
122038	y1	1	0	3)Toronto	0	0	1	1	1	1	1	4.1	0	1	1
122038	y2	1	0	3)Toronto	0	0	0	0	1	1	1	4.1	0	1	2
122038	y3	2	0	3)Toronto	0	0	0	0	1	1	1	4.1	0	1	3
122038	y4	5	0	3)Toronto	0	0	0	0	1	0	0	4.1	0	1	4
122039	b	4	0	3)Toronto	1	0	0	1	1	1	1	3.2	0	1	0
122039	y1	3	0	3)Toronto	1	0	0	1	0	1	1	3.2	0	1	1
122039	y2	1	0	3)Toronto	1	0	0	1	1	1	1	3.2	0	0	2
122039	y3	3	0	3)Toronto	1	0	0	1	0	1	1	3.2	0	0	3
122039	y4	1	0	3)Toronto	1	0	1	1	0	1	1	3.2	0	0	4
122040	b	1	0	3)Toronto	1	0	1	0	0	0	0	4.6	1	1	0
122040	y1	2	0	3)Toronto	1	0	1	0	0	0	0	4.6	1	1	1
122040	y2	1	0	3)Toronto	1	0	0	0	0	0	0	4.6	1	0	2
122040	y3	1	0	3)Toronto	1	0	0	0	0	0	0	4.6	1	0	3
122040	y4	1	0	3)Toronto	1	0	0	0	0	0	0	4.6	1	0	4
122041	b	3	1	3)Toronto	1	1	1	1	1	1	1	2	1	1	0
122041	y1	2	1	3)Toronto	1	1	0	1	1	1	1	2	1	1	1
122041	y3	1	1	3)Toronto	1	1	0	0	0	0	0	2	1	0	3
122041	y4	1	1	3)Toronto	1	1	0	0	0	0	0	2	1	0	4
122042	b	2	0	3)Toronto	0	0	0	0	1	0	0	4	0	1	0
122042	y1	2	0	3)Toronto	0	0	1	0	0	0	0	4	0	1	1
122042	y2	2	0	3)Toronto	0	0	0	0	0	0	0	4	0	0	2
122042	y3	1	0	3)Toronto	0	0	1	0	0	0	0	4	0	0	3
122042	y4	1	0	3)Toronto	0	0	0	0	0	0	0	4	0	0	4
122043	b	2	0	3)Toronto	0	0	1	1	1	1	1	3.4	0	1	0
122043	y1	2	0	3)Toronto	0	0	1	1	1	1	1	3.4	0	1	1
122043	y2	2	0	3)Toronto	0	0	1	1	1	1	1	3.4	0	0	2
122043	y3	3	0	3)Toronto	0	0	0	1	1	1	1	3.4	0	1	3
122043	y4	3	0	3)Toronto	0	0	1	1	1	1	1	3.4	0	1	4
122044	b	3	0	3)Toronto	0	0	0	1	0	1	1	4.8	1	1	0
122044	y1	1	0	3)Toronto	0	0	0	0	1	0	0	4.8	1	1	1
122044	y2	3	0	3)Toronto	0	0	0	0	0	0	0	4.8	1	1	2
122044	y3	3	0	3)Toronto	0	0	0	0	0	0	0	4.8	1	0	3
122044	y4	1	0	3)Toronto	0	0	0	0	0	0	0	4.8	1	0	4
122045	b	2	0	3)Toronto	0	0	0	0	0	0	0	4	0	1	0
122045	y1	2	0	3)Toronto	0	0	1	0	0	1	1	4	0	1	1
122045	y2	1	0	3)Toronto	0	0	0	0	0	0	0	4	0	0	2
122045	y3	2	0	3)Toronto	0	0	0	0	0	0	0	4	0	1	3
122045	y4	2	0	3)Toronto	0	0	0	0	0	0	0	4	0	1	4
122046	b	3	0	3)Toronto	0	1	0	0	1	0	0	4.7	1	1	0
122046	y2	1	0	3)Toronto	0	1	1	0	0	0	0	4.7	1	0	2
122046	y3	1	0	3)Toronto	0	1	0	0	0	0	0	4.7	1	0	3
122047	b	1	1	3)Toronto	0	0	0	0	0	0	0	3.8	1	1	0
122047	y1	1	1	3)Toronto	0	0	0	0	0	0	0	3.8	1	1	1
122048	b	2	0	3)Toronto	0	0	0	0	0	0	0	3.1	1	1	0
122048	y1	1	0	3)Toronto	0	0	0	0	0	0	0	3.1	1	0	1
122048	y2	2	0	3)Toronto	0	0	0	0	0	1	1	3.1	1	1	2
122048	y3	2	0	3)Toronto	0	0	0	1	0	1	1	3.1	1	1	3
122048	y4	2	0	3)Toronto	0	0	0	0	0	0	0	3.1	1	1	4
122049	b	2	0	3)Toronto	0	0	0	1	0	1	1	3.1	0	1	0
122049	y1	0	0	3)Toronto	0	0	0	0	1	0	0	3.1	0	1	1
122050	b	3	0	3)Toronto	0	1	0	0	0	1	1	4.8	0	1	0
122050	y2	0	0	3)Toronto	0	1	1	0	0	0	0	4.8	0	0	2
122050	y3	1	0	3)Toronto	0	1	1	0	0	0	0	4.8	0	0	3
122050	y4	1	0	3)Toronto	0	1	1	0	0	0	0	4.8	0	0	4
122051	b	4	0	3)Toronto	1	1	0	1	1	1	1	5.3	1	1	0
122051	y1	1	0	3)Toronto	1	1	0	1	1	1	1	5.3	1	0	1
122051	y2	1	0	3)Toronto	1	1	0	0	0	0	0	5.3	1	0	2
122051	y3	5	0	3)Toronto	1	1	0	1	0	1	1	5.3	1	1	3
122051	y4	1	0	3)Toronto	1	1	0	0	1	0	0	5.3	1	1	4
122052	b	1	0	3)Toronto	0	0	1	0	0	0	0	5.4	1	1	0
122052	y1	1	0	3)Toronto	0	0	1	0	0	0	0	5.4	1	1	1
122052	y2	0	0	3)Toronto	0	0	0	0	0	0	0	5.4	1	1	2
122052	y3	1	0	3)Toronto	0	0	0	0	0	0	0	5.4	1	1	3
122052	y4	2	0	3)Toronto	0	0	0	0	0	0	0	5.4	1	0	4
122053	b	1	0	3)Toronto	0	0	0	0	0	0	0	5.3	0	1	0
122053	y1	2	0	3)Toronto	0	0	0	0	0	0	0	5.3	0	1	1
122053	y3	2	0	3)Toronto	0	0	0	0	0	0	0	5.3	0	1	3
122053	y4	2	0	3)Toronto	0	0	0	0	0	0	0	5.3	0	0	4
122054	b	3	0	3)Toronto	0	0	0	0	0	1	1	4.2	1	1	0
122054	y1	1	0	3)Toronto	0	0	0	0	0	0	0	4.2	1	0	1
122054	y2	0	0	3)Toronto	0	0	0	0	0	0	0	4.2	1	0	2
122054	y3	1	0	3)Toronto	0	0	0	0	0	0	0	4.2	1	0	3
122054	y4	1	0	3)Toronto	0	0	0	0	0	0	0	4.2	1	0	4
122055	b	1	0	3)Toronto	1	1	0	0	1	0	0	5.4	1	1	0
122055	y1	1	0	3)Toronto	1	1	0	0	0	0	0	5.4	1	1	1
122055	y2	1	0	3)Toronto	1	1	0	0	0	0	0	5.4	1	0	2
122055	y3	1	0	3)Toronto	1	1	0	0	0	0	0	5.4	1	0	3
122055	y4	1	0	3)Toronto	1	1	0	0	0	0	0	5.4	1	0	4
122056	b	3	0	3)Toronto	0	1	1	0	0	0	0	3.4	1	1	0
122057	b	3	0	3)Toronto	0	1	1	1	1	1	1	2.6	1	1	0
122057	y1	1	0	3)Toronto	0	1	1	1	1	1	1	2.6	1	0	1
122057	y2	2	0	3)Toronto	0	1	0	0	1	0	0	2.6	1	0	2
122057	y3	4	0	3)Toronto	0	1	1	1	0	1	1	2.6	1	0	3
122057	y4	2	0	3)Toronto	0	1	1	0	0	0	0	2.6	1	1	4
122058	b	2	0	3)Toronto	0	0	1	0	0	0	0	4.3	1	1	0
122058	y1	1	0	3)Toronto	0	0	1	0	0	0	0	4.3	1	1	1
[truncated: 2,920 more rows]
